**A divergent kinase lacking the glycine-rich loop regulates membrane ultrastructure of the  
*Toxoplasma parasitophorous vacuole***

Tsebaot Beraki<sup>1</sup>, Xiaoyu Hu<sup>1</sup>, Malgorzata Broncel<sup>2</sup>, Joanna C. Young<sup>2</sup>, William J. O'Shaughnessy<sup>1</sup>,  
Dominika M. Borek<sup>3,4</sup>, Moritz Treeck<sup>2</sup>, Michael L. Reese<sup>1,4</sup>

<sup>1</sup>Department of Pharmacology, University of Texas, Southwestern Medical Center, Dallas, TX USA

<sup>2</sup>Signalling in Apicomplexan Parasites Laboratory, The Francis Crick Institute, London UK

<sup>3</sup>Department of Biophysics, University of Texas, Southwestern Medical Center, Dallas, TX USA

<sup>4</sup>Department of Biochemistry, University of Texas, Southwestern Medical Center, Dallas, TX USA

Address correspondence to Michael L. Reese, [michael.reese@utsouthwestern.edu](mailto:michael.reese@utsouthwestern.edu)

## 1 **Abstract**

2 Apicomplexan parasites replicate within a protective organelle called the parasitophorous vacuole  
3 (PV). The *Toxoplasma gondii* PV is filled with a network of tubulated membranes, which are thought to  
4 facilitate trafficking of effectors and nutrients. Despite being critical to parasite virulence, there is scant  
5 mechanistic understanding of the network's functions. Here, we identify the parasite secreted kinase  
6 WNG1 as a critical regulator of tubular membrane biogenesis. WNG1 family members adopt an  
7 atypical protein kinase fold lacking the glycine rich ATP-binding loop that is required for catalysis in  
8 canonical kinases. Unexpectedly, we find that WNG1 is an active protein kinase that localizes to the  
9 PV lumen and phosphorylates PV-resident proteins, several of which are essential for the formation of  
10 a functional intravacuolar network. Moreover, we show that WNG1-dependent phosphorylation of  
11 these proteins is required for their membrane association, and thus their ability to tubulate  
12 membranes. Consequently, WNG1 knockout parasites have an aberrant PV membrane ultrastructure.  
13 Collectively, our results describe a unique family of *Toxoplasma* kinases and implicate phosphorylation  
14 of secreted proteins as a mechanism of regulating PV formation during parasite infection.  
15

## 16 **Introduction**

17 Protein phosphorylation is the most common post-translational modification in eukaryotic cells.  
18 The addition and removal of specific phosphates is a key mediator of cellular information processing  
19 and signal transduction. Phosphorylation is catalyzed by protein kinases, which form one of the largest  
20 families of enzymes in mammals (1). The interface between an intracellular pathogen and its host cell  
21 is a special case in cellular signaling that defines both a pathogen's ability to manipulate its host and  
22 the host's ability to respond to and control the pathogen. The parasite *Toxoplasma gondii* is one of the  
23 most successful pathogens in the world, as it can infect virtually any cell type of almost all warm-  
24 blooded animals, including approximately one third of humans worldwide (2). *Toxoplasma* directly  
25 manipulates signaling at the host-pathogen interface by secreting a variety of effector proteins (3, 4),  
26 including ~50 protein kinases and pseudokinases (5, 6). However, the functions of most of these  
27 effectors are unknown.

28 One vital role for these secreted kinases is to maintain the parasite's replicative niche within its  
29 host cell. Like many intracellular pathogens, *Toxoplasma* survives in a specialized membranous  
30 organelle called the parasitophorous vacuole (PV). This vacuole is maintained as distinct from host  
31 endosomal trafficking, and is protected from fusion with host lysosomes (7). Disruption of the PV  
32 membrane by host immune defenses leads to parasite death (8, 9), and the parasite has evolved  
33 effector molecules that can protect it from such host attacks (10, 11). Far from being an impermeable  
34 wall, however, the parasite selectively exports (12) and imports (13, 14) molecules across the PV  
35 membrane.

36 One of the most striking features of the PV is the intravacuolar network (IVN) of membranous  
37 tubules of 20-50 nm diameter that appear to bud from the PV membrane into the vacuolar lumen (15).  
38 Notably, the inside of the tubules is topologically contiguous with the host cytosol (15). The IVN has  
39 been associated with diverse phenomena, including nutrient uptake via trafficking of host-derived  
40 vesicles (16, 17), "ingestion" of soluble host proteins by the parasite (18), protection from antigen  
41 presentation (19), and a means by which parasite effectors localize to the PV membrane (20) and thus

42 protect its destruction by host immune effectors (21). The dense granular proteins GRA2 or GRA6 are  
43 required for IVN biogenesis and parasites that lack either protein grow in vacuoles without the well-  
44 structured membranous tubules. While IVN-deficient parasites grow normally in *in vitro* cell culture,  
45 they have strongly attenuated virulence in a mouse model of infection (22).

46 The PV is thus a complex cellular compartment that mediates sophisticated, multidirectional  
47 trafficking, though the molecules that regulate its functions are largely a mystery. Many of the known  
48 components of the PV, and of the IVN in particular, are highly phosphorylated after they have been  
49 secreted from the parasite (23). About one third of the *Toxoplasma* kinome contains signal peptides  
50 but lack transmembrane domains, and are thus predicted to be secreted. Most of these kinases  
51 belong to a parasite-specific family that includes a number of virulence effectors (24, 25, 10) secreted  
52 into the host cytosol from the parasite rhoptries during invasion (26), and have been dubbed the  
53 “rhoptry kinase (ROPK)” family. A previous bioinformatic effort annotated the majority of predicted  
54 secreted kinases in *Toxoplasma* as ROPKs (5). Notably, vertebrate or ROPK effector kinases localized  
55 in the host cytosol cannot access PV-resident proteins on the luminal side of the PV membrane.  
56 However, two members of the ROPK family, ROP21/27, were recently found to localize to a different  
57 set of secretory organelles, the dense granules, which secrete into the PV lumen. Because ROP21/27  
58 are expressed mainly during the chronic stage of the parasite (27), they are unlikely to function in the  
59 regulation of processes during the acute stage, such as the biogenesis of the IVN.

60 In the present work, we identify a specialized family of kinases that lack the glycine-rich loop that  
61 is critical for nucleotide-binding in canonical kinases, leading us to name them the With-no-Gly-loop, or  
62 WNG, family. These WNG kinases are conserved throughout the coccidian family of parasites to which  
63 *Toxoplasma* belongs and are secreted into the PV. We solved the crystal structure of a family member  
64 which demonstrates that the N-lobe of the kinase does indeed lack the structural elements that form  
65 the Gly-loop. We found that at least one member of the family, WNG1/ROP35, is catalytically active  
66 and we identified a number of proteins associated with the IVN membrane as phosphorylated in a  
67 WNG1-dependent manner. Finally, we demonstrated that loss of these phosphorylation sites  
68 correlates with aberrant PV ultrastructure, likely due to the loss membrane association of proteins that  
69 drive the biogenesis of IVN tubules. Taken together, our data show the WNG family of kinases  
70 mediates specialized functions in regulating the proteins that create and maintain the coccidian host-  
71 parasite vacuolar interface.

## 72 **Results**

### 73 *Identification of a divergent family of coccidian secreted kinases that lack the canonical glycine-rich* 74 *loop*

75 We reasoned that regulatory phosphorylation of PV-resident proteins would most likely be carried  
76 out by a conserved resident protein kinase that is secreted from the parasites dense granules. To  
77 identify potential PV-resident kinases, we compared the sequences of the predicted secreted kinases  
78 in *Toxoplasma*. We were surprised to find that a small family of parasite kinases appear to completely  
79 lack the glycine-rich, or P-loop, that is found in all canonical kinases and is required for binding the  
80 ATP in the active site (28, 29) (Supplemental Fig S1a,b). These kinases include three proteins  
81 annotated as ROPKs (ROP33, ROP34, and ROP35), and a pseudokinase, BPK1, that has previously  
82 been identified as PV resident and a component of the bradyzoite cyst wall (30). Phylogenetic analysis

83 gave clear support for these proteins forming a clade that is distinct from canonical protein kinases  
84 (Figure 1), including the parasite ROPKs. Furthermore, we identified members of this family in every  
85 species of coccidian parasite for which genomic sequence is available (Figure 1 and Supplemental  
86 Table S1c), suggesting that they play an important role in the parasites' pathogenic lifestyle. Notably,  
87 the majority of ROPKs are not conserved throughout coccidian parasites, with the exception of the PV-  
88 resident kinases ROP21/27 (31). Given the lack of the glycine-rich loop and phylogenetic evidence  
89 that indicates that these proteins form a distinct clade, we propose that the family be named the WNG  
90 (With-No-Gly-loop) kinases.

#### 91 *WNG kinases are secreted into the parasitophorous vacuole*

92 As noted above, BPK1 has previously been identified as a PV-resident pseudokinase (30). We  
93 thus sought to assess the localization of other WNG kinases, and concentrated on the most divergent  
94 members of the family in *Toxoplasma*: ROP34 and ROP35 (Figure 1). We engineered parasite strains  
95 in which the endogenous copies of each of ROP34 and ROP35 were expressed in frame with a 3xHA  
96 tag. While both proteins appeared to be secreted into the PV, neither ROP35 nor ROP34 co-localized  
97 with the rhoptry marker ROP2 (Figure 2A). ROP35 co-localized well with the dense granular marker,  
98 GRA6, both within the parasites and after secretion into the PV (Figure 2B). ROP34 displayed a  
99 slightly different localization, in which the secreted protein localized to the basal end of the parasites  
100 within a vacuole. In addition, we observed brighter foci of ROP34 within parasites than within the  
101 vacuole, suggesting that ROP34 does not accumulate within the PV to the same extent as ROP35.  
102 While these data appear inconsistent with reported localization of ROP35 to the parasite PV via  
103 rhoptry secretion (32), we note that the previous report did not colocalize ROP35 with a known rhoptry  
104 marker, nor did it analyze endogenously tagged protein, both of which could lead to misinterpretation  
105 of the protein's endogenous localization. As the "ROP" designation was originally created to indicate  
106 localization rather than function (33), we propose that the WNG kinases be renamed to avoid  
107 confusion with the unrelated ROPK family. Given its high conservation (Figure 1 and Supplemental  
108 Table S1c), we propose ROP35 be renamed WNG1, and other family members annotated as in Figure  
109 1 and Supplemental Table S1c.

#### 110 *The crystal structure of TgBPK1 reveals a non-canonical active site that lacks the Gly-loop*

111 While the Gly-loop is thought to be both a critical catalytic and structural element of the protein  
112 kinase fold, a number of unusual kinases have been demonstrated to have either adapted a canonical  
113 kinase fold to perform a specialized non-catalytic function (34, 35, 11), or to use an atypical fold and  
114 active site to catalyze phosphoryl transfer (36, 37). We therefore sought structural information to better  
115 understand the topology of the WNG kinase fold. While we were unable to crystallize an active WNG  
116 kinase, we readily obtained crystals of the *Toxoplasma* pseudokinase BPK1 (Bradyzoite Pseudokinase  
117 1). We solved the structure of BPK1 to 2.5 Å resolution (Figure 3A and Table 1). Like WNG1, BPK1 is  
118 secreted into the lumen of the PV (30), and is a clear member of the WNG family (Figure 1). As such,  
119 BPK1 shares both primary identity and predicted secondary structure with other WNG kinases  
120 throughout its sequence (Figure S1a), indicating that its structure would provide faithful insight into the  
121 WNG kinase fold.

122 The BPK1 structure revealed a divergent kinase fold in which the Gly-loop and the first  $\beta$ -strand  
123 that stabilizes it ( $\beta$ 1 in PKA nomenclature), have been replaced by a helical extension that packs

124 against the top of the N-lobe of the kinase (Figure 3). Remarkably, not only do the WNG kinases lack  
125 a Gly-rich primary sequence, but have replaced the structural elements that compose the motif,  
126 resulting in a reorganized N-lobe architecture (Figure 3C,D). The core of the kinase fold, however, is  
127 remarkably well conserved, supporting our phylogenetic data (Figure 1) that suggest the WNG family  
128 diverged from a canonical Ser/Thr kinase fold. Two salt bridges help stabilize the BPK1 N-lobe within  
129 the pseudoactive site, including the bridge between the conserved  $\alpha$ C-helix Glu and VAIK-Lys (Figure  
130 S3A). Notably, the lack of the Gly-loop and  $\beta$ 1-strand creates an active site that is much more open  
131 than that of a canonical kinase, such as PKA (Figure S3B,C).

132 While BPK1 is a confirmed pseudokinase that cannot bind nucleotide (38), the other WNG kinase  
133 family members have conserved the other canonical motifs essential for catalysis (Figure S1a and  
134 Figure 4A, suggesting they may be active. To better understand how the WNG kinases have adapted  
135 their active sites to bind nucleotide and catalyze phosphoryl transfer without a Gly-loop, we modeled  
136 the WNG1/ROP35 active site using the structure of BPK1 as a template (Figure 4B,C). This model,  
137 together with analysis of sequence conservation among WNG1/ROP35 orthologs (Supplemental  
138 Figure S4), confirmed that the core of the canonical active site appears largely conserved (Figure 4C).

139 We expressed and purified the kinase domain of *Toxoplasma* WNG1/ROP35 and found that it  
140 robustly phosphorylated the generic substrate MBP in an *in vitro* kinase assay. We verified that  
141 mutation of each of the canonical motifs that enable catalysis and  $Mg^{2+}$ /ATP-binding (HRD\*, VAIK\*,  
142 D\*FG) resulted in loss of kinase activity (Figure 4D). We also identified three notable variations from  
143 typical motifs within the active site. First, we noted that while substitution of the Ala in the VAIK motif to  
144 a bulkier side chain usually interferes with ATP-binding, WNG family members appear to prefer a Val  
145 at this position. Mutation of V344A in WNG1/ROP35 reduced the specific activity of the kinase to  
146 ~20% of wild-type (Figure 4D), consistent with a requirement for repositioning the ATP within the WNG  
147 active site. Second, we noted that WNG1/ROP35 orthologs have conserved a stretch of basic  
148 residues (R312/313 in *Toxoplasma*) that are placed near where the Gly-loop would lie (Figures 4B,C  
149 and S4). We therefore reasoned that the side chains of these residues may form a degenerate Walker  
150 A motif-like cap (28), and help replace the Gly-loop function. Consistent with such a model, both  
151 R312A and R313A mutants exhibited reduced specific activity, though R313A showed a much less  
152 severe effect than R312A (Figure 4D).

153 Finally, we noted that the WNG kinase  $Mg^{2+}$ -coordinating DFG motif had an acidic residue (E447  
154 in WNG1) replacing the Gly. As in our BPK1 structure (Figure S3A), the WNG1 E447 appears to form  
155 a salt-bridge with a conserved basic residue +2 from the VAIK Lys (Figure 4C; K348 in WNG1). This  
156 substitution is unusual for two reasons. (i) the DFG Gly is thought to be important for the regulation of  
157 many kinases, as it enables the peptide backbone to “flip” between two states (“DFG-in” and “DFG-  
158 out”; (39, 40)); (ii) the side chain of the Glu would be predicted to point towards the phosphates of the  
159 bound nucleotide (Figure 4C), and would thus electrostatically clash. We reasoned that a clash may  
160 be prevented, however, if the residue was participating in  $Mg^{2+}$ -coordination, as the Asp in the DFG  
161 does. The pseudokinase domain of metazoan RNaseL also has this unusual substitution, in this case,  
162 a DFD motif. The crystal structure of RNaseL pseudokinase demonstrated that both acidic residues in  
163 the DFD motif participate in  $Mg^{2+}$ -coordination (41), helping to explain the protein’s unusually high  
164 affinity (1  $\mu$ M) for ATP. We therefore tested whether mutation of WNG1/ROP35 E457 to either Gly or  
165 Ala would affect its activity, and found that both mutant proteins had severely attenuated activity that  
166 was not significantly different from the kinase-dead HRD D437S mutant (Figure 4D).



167 We went on to determine that our recombinantly expressed WNG1 has an *in vitro*  $K_{M,ATP}$  of  
168  $520 \pm 90 \mu\text{M}$  (Figure 4E), using MBP as a substrate. Given the lack of the Gly-loop, which is a key ATP-  
169 binding element, it is unsurprising that this  $K_{M,ATP}$  is higher than the 10-100  $\mu\text{M}$  reported for many  
170 canonical kinases (42). However, the mammalian kinases Src and Akt have reported  $K_{M,ATP}$  of  
171 approximately 200  $\mu\text{M}$  and 500  $\mu\text{M}$ , respectively (42), indicating that our value for WNG1/ROP35 is  
172 consistent with an active kinase. Furthermore, the PV membrane is permeable to small molecules  
173 such as nucleotides (13, 14), and cellular ATP concentrations range between 2-5 mM (43), suggesting  
174 that PV nucleotide concentrations are well above that needed for activity with such an affinity for  
175 nucleotide.

176 Taken together, our structural and biochemical data suggest that WNG1/ROP35 and other family  
177 members are active protein kinases that have evolved multiple alterations to the active site to  
178 compensate for the lack of a Gly-loop. Furthermore, these broad structural changes imply an  
179 evolutionary pressure to reshape the protein structure to perform a specialized function.

### 180 *The intravacuolar network of parasites deficient in WNG1 kinase activity is unstable*

181 We next sought to identify potential functions for the WNG kinases. We chose to concentrate our  
182 efforts on WNG1 because it is conserved throughout coccidia (Figure 1), concentrates within the PV  
183 lumen (Figure 2), and is important for chronic infection in a mouse model of infection (44). We used  
184 double homologous recombination to knock out the WNG1 locus in the  $RH\Delta ku80\Delta hxgprt$  background  
185 (Supplemental Figure S5a). The resulting  $RH\Delta wng1$  parasites showed no obvious growth phenotype  
186 in normal culture conditions (not shown). We also generated WNG1-complemented strains by  
187 knocking a wild-type or kinase-dead (D437S; the HRD motif) copy of WNG1 into the empty Ku80 locus  
188 of the  $RH\Delta wng1$  strain. The kinase was expressed with its native promoter and in-frame with a C-  
189 terminal 3xHA. Both the active and kinase-dead complement strains expressed WNG1 at similar  
190 levels to the levels in the endogenously tagged parasite strain, and were appropriately localized to the  
191 dense granules and IVN (Supplemental Figure S5b).

192 To examine the ultrastructure within the vacuoles of parasites with and without active WNG1, we  
193 used transmission electron microscopy (TEM). We compared the vacuoles of HFFs that had been  
194 infected for 24 hours with either parental,  $RH\Delta wng1$ , or the complemented strains (Figures 5, S5c).  
195 The IVN is a complex structure of branching membranous tubules that fills a large portion of the PV  
196 lumen (45). As expected, we observed a dense network of tubules filling the luminal space between  
197 the parental parasites (Figure 5A). While we did observe regions with IVN tubules in  $RH\Delta wng1$   
198 vacuoles, they been largely replaced with unusual multilamellar structures containing many 70 – 150  
199 nm diameter vesicles within a larger 0.5 – 2  $\mu\text{m}$  membrane-delineated object (Figure 5B). These  
200 multilamellar structures appear much less electron dense than the tubular network, suggesting a lower  
201 protein content. Consistent with this observation, the internal vesicles appear to have been lost in  
202 some structures (Figure 5B, S5c), potentially due to reduced crosslinking before plastic embedding.  
203 Importantly, we prepared samples from mutant parasite strains in parallel with a parental control. We  
204 never observed loss of tubular structures in the parental strains, suggesting that this phenotype is not  
205 an artifact of our preparation. While vacuoles of wild-type WNG1 complemented parasites were  
206 indistinguishable from the parental, those formed by the kinase-dead complemented strain exhibited  
207 the same loss of IVN tubules and its apparent replacement with large multilamellar vesicles (Figures  
208 5C-D). These changes were quantified in Figure 5E,F. These data indicate that WNG1 phosphorylates

209 one or more proteins involved in IVN biogenesis and stability, and that this phosphorylation is required  
210 for normal function.

### 211 *Quantitative phosphoproteomics reveals GRA proteins as candidate substrates of WNG1*

212 To identify potential substrates of WNG1, we compared phosphoproteomes of the parental (WT)  
213 and RH $\Delta$ wng1 strains using stable isotope labeling with amino acids in cell culture (SILAC)  
214 quantitative mass spectrometry (MS) based proteomics as previously described (46). Briefly, we  
215 infected human foreskin fibroblasts (HFFs) for 24 h with WT or RH $\Delta$ wng1 parasites previously grown  
216 in either “heavy” (H) or “light” (L) SILAC media. After cell lysis we mixed the samples (H and L) in 1:1  
217 ratio applying forward ( $\Delta$ wng1/WT), reverse (WT/ $\Delta$ wng1) as well as control labeling (WT/WT). This  
218 mixing strategy ensures that both systematic and technical errors due to stable isotope labeling can be  
219 identified and results in high confidence of MS quantifications. Mixed lysates were then digested with  
220 LysC/trypsin and phosphopeptides enriched and fractionated as described in the methods section. We  
221 prepared 3 biological replicates for WT vs  $\Delta$ wng1 samples and analyzed quantitative differences in the  
222 proteome and phosphoproteome between WT and mutant samples by mass spectrometry. We  
223 identified 10,301 phosphosites for both human and *Toxoplasma* and obtained quantification (H/L  
224 ratios) for 8,755 of them. *Toxoplasma*-specific sites constituted 2,296 (~30%) of all quantified sites  
225 (Supplemental Table S6), which is a similar proportion of sites identified in previous studies using  
226 intracellular *Toxoplasma* parasites (23). In order to identify significantly changing sites between WT  
227 and  $\Delta$ wng1 parasites a one sample t-test was performed applying the following parameters: p-value <  
228 0.05 and  $|\log_2|$  fold change > 1 (Figure 6). Furthermore, phosphosite significance was also correlated  
229 with the SILAC control sample (WT/WT) and the proteome data to control for differential  
230 phosphorylation originating from the technical variation in the system and protein abundance,  
231 respectively (Supplemental Table S6). We also identified a number of phosphorylation sites on protein  
232 with consistent loss of phosphorylation in RH $\Delta$ wng1 parasite strains, that however, did not pass the t-  
233 test significance test (Supplemental Table S6). However, all phosphorylation sites close to the p-value  
234 cutoff are predicted or known secreted proteins, indicating that the p-value may be overly stringent in  
235 this case.

236 We identified 10 proteins in which phosphorylation was significantly reduced between the parental  
237 and RH $\Delta$ wng1 samples (Figure 6, Table 2, and Supplemental Table S6). Among these candidate  
238 substrates were 6 proteins well-known to be associated with the parasite IVN tubules (Table 2),  
239 including GRA2 and GRA6, which are essential for IVN biogenesis (45). Another hit, GRA37, was  
240 identified in a recent proteomics analysis of PV membrane proteins, and was found to colocalize with  
241 IVN markers (47). We identified three proteins with WNG1-dependent phosphorylation that have not  
242 been previously studied, and are therefore annotated as “hypothetical” in the genomic database  
243 (ToxoDB v32 gene models: TGGT1\_244530, TGGT1\_254000, and TGGT1\_267740). We reasoned  
244 that if WNG1 is, indeed, a PV-resident kinase, WNG1-dependent phosphorylation should predict PV  
245 (and possibly IVN) localization. We therefore engineered strains in which the proteins were  
246 endogenously tagged at their C-terminus with a 3xHA epitope. Immunofluorescence revealed that  
247 each of these proteins were secreted into the PV, and co-localized with the dense granular and IVN  
248 marker GRA6 both within parasites and within the vacuolar lumen (Figure 7A). We have thus  
249 annotated these three genes as encoding newly described dense granular proteins GRA43, GRA44,  
250 GRA45 (Tables 2 and 3).

251 In addition to the phosphosites that were lost in the vacuoles lacking WNG1, we identified 7 sites  
252 where phosphorylation was significantly increased in the *RHΔwng1* samples over parental (Table 3).  
253 These include 1 site on GRA6, 5 sites on GRA7, and 1 site on TGGT1\_244530. The phosphorylated  
254 states of GRA6 and GRA7 in cells infected with wild-type parasites are readily distinguishable by SDS-  
255 PAGE and western blot (16, 48). To confirm the changes in phosphorylation of these proteins, we  
256 blotted lysates of cells infected with either the parental or *RHΔwng1* strains (Figure 7B). To  
257 demonstrate that these changes were due to the presence of WNG1, and to confirm the requirement  
258 of WNG1 kinase activity, we also assessed GRA protein membrane association in the wild-type and  
259 kinase dead WNG1 complemented strains (Figure S5a). We then analyzed lysates of cells infected  
260 with each the above strains by western blot probed with either anti-GRA6 or anti-GRA7 antibody. The  
261 slower migrating, phosphorylated band of GRA6 was apparent in both parental and wild-type  
262 complemented lysates, but was undetectable in the knockout and kinase-dead complemented lysates  
263 (Figure 7B). Consistent with complex WNG1-dependent differences in phosphorylation of GRA7, we  
264 observed a reduction in the total amount of phosphorylated GRA7 in the knockout and wild-type  
265 complemented parasites, but observed other slowly migrating bands, presumably the novel phospho-  
266 states listed in Table 3. Our data thus demonstrate WNG1 is an active, PV-resident kinase that is  
267 required for the phosphorylation of proteins associated with the PV-facing leaflet of the IVN  
268 membrane.

269 Given that these candidate WNG1 substrates have been demonstrated to either associate with or  
270 integrate into PV membranes (48–53), we asked whether WNG1 itself was membrane associated  
271 once secreted into the PV. To test this, we mechanically disrupted a human foreskin fibroblast (HFF)  
272 monolayer that had been highly infected with WNG1-3xHA parasites. Intact parasites were separated  
273 from host and PV membranes by a low speed (2400 g) spin, and the resulting supernatant was further  
274 separated by ultracentrifugation. WNG1, like the known integral membrane protein (and putative  
275 WNG1 substrate) GRA2, was found largely in the membrane-associated pellet (Figure 7C). In parallel,  
276 we partitioned an aliquot of the same low speed supernatant with Triton-X-114 (54). While GRA2 was  
277 found entirely in the detergent phase, WNG1 partitioned in the aqueous phase (Figure 7D), indicating  
278 that it is a soluble protein that is membrane-associated, rather than integrating into the membrane  
279 directly. Such a non-integral association of WNG1 with the PV membrane is consistent both with the  
280 lack of a predicted transmembrane, amphipathic helix, or other membrane association domain in the  
281 WNG1 sequence, and with our ability to purify soluble recombinant protein.

### 282 *Efficient membrane association of proteins involved in intravacuolar network biogenesis depends on* 283 *WNG1 kinase activity*

284 The trafficking of IVN-associated proteins is highly unusual. Many GRA proteins integrate  
285 amphipathic or transmembrane helices into the IVN membrane, but remain soluble while trafficking  
286 through the parasite secretory system (48, 49, 53), presumably by complexing with an unidentified  
287 chaperone. Notably, many of the WNG1-dependent phosphorylation sites are located in predicted  
288 helical regions of sequence (Figure S8A) that have been shown to be required for GRA membrane  
289 association (50, 55). We therefore reasoned that phosphorylation of substrates by WNG1 may help  
290 regulate the switch from soluble to membranous states of IVN-associated GRA proteins. To test this  
291 hypothesis, we assessed WNG1 membrane association by comparing fractionated lysates from  
292 parental, *RHΔwng1*, and the kinase-active and kinase-dead complement strains. We prepared



293 samples from 6 independent infections per condition, which were then separated by SDS-PAGE and  
294 analyzed by protein immunoblotting using antibodies recognizing various GRA proteins as indicated in  
295 Figure 8. We observed no difference in Triton-X-114 partitioning for any of the strains (Figure S8B).  
296 We quantified the relative soluble amounts of each protein (Figure 8B), which revealed a requirement  
297 for WNG1 kinase activity on IVN GRA membrane association. In particular, GRA4, GRA6, and GRA7  
298 exhibited significant reductions in the fraction of protein that was PV membrane-associated in the  
299  $RH\Delta wng1$  and kinase-dead samples. Notably, the phosphorylated forms of GRA6 and GRA7 are  
300 found exclusively in the membrane-associated fractions (Figure 8A), and the loss of the  
301 phosphorylated states does not appear to result in a concomitant increase in unphosphorylated  
302 protein at the membrane. Taken together, our results suggest that WNG1-dependent phosphorylation  
303 of the GRA proteins promotes their association and is critical for the proper formation of the IVN.

## 304 Discussion

305 We have identified an unusual family of parasite-specific protein kinases that divergently evolved  
306 from a canonical protein kinase fold and have lost the typical Gly-rich loop. We have demonstrated  
307 that, in spite of missing a structural element thought to be critical to nucleotide binding and catalytic  
308 activity, the WNG kinases can catalyze phosphoryl transfer. Through structural and biochemical  
309 analyses, we have delineated subtle changes to the kinase active site that facilitate its catalytic  
310 activity. We went on to show that the most conserved member of the family, WNG1/ROP35, is  
311 secreted by *Toxoplasma* into the PV, where it associated with the PV membranes. We found that  
312 WNG1 kinase activity is required for the phosphorylation of many of the proteins known to be  
313 associated with the IVN membranes. Furthermore, loss of WNG1 kinase activity was correlated with a  
314 reduction in membrane association for a subset of the IVN proteins for which there are antibodies  
315 available. Finally, we found that parasite vacuoles deficient in catalytically active WNG1 have a  
316 substantial reduction in their IVN, suggesting that kinase activity is required for either the efficient  
317 formation or stability of the IVN membrane tubules.

318 The unusual WNG kinase fold raises the question: what may have been the evolutionary pressure  
319 that drove the divergence of the WNG family and loss of the Gly-loop? WNG1 is the most conserved  
320 member of the family, and appears to preferentially phosphorylate sites on proteins closely associated  
321 with the IVN membrane. Moreover, many of the sites we identified are at or near predicted helices  
322 (Figure S8A) that have been previously implicated in GRA protein interaction with membranes (50, 55,  
323 56), or, in the case of GRA3, within a predicted coiled-coil. The rearrangement of the WNG active site  
324 has resulted in an unusually open active site (Figure S3B,C) that may better accommodate such  
325 folded or otherwise sterically restricted substrates. The atypical “alpha” family of kinases (57) are also  
326 able to phosphorylate helical substrates, such as the coiled-coil domains of myosin heavy chains (58).  
327 The alpha kinases share no detectable sequence homology to canonical protein kinases in spite of  
328 their similar overall folds (59, 60). The active sites of alpha kinases differ in several ways from  
329 canonical protein kinases. As with the WNG kinases, the alpha kinases have a more open active site  
330 that would accommodate a helical substrate (60). In any event, a comprehensive understanding of the  
331 mechanisms of substrate recognition in atypical kinases such as the WNG and alpha kinase families  
332 will require structural studies of kinase:substrate complexes.

333 Notably, the phosphosites we identified as WNG1-dependent are not detectable in extracellular  
334 parasites (23), indicating that WNG1 phosphorylates its substrates in the PV lumen rather than while

335 trafficking through the parasite secretory system. Our phosphoproteomics data revealed both  
336 phosphosites lost in WNG1 knockout parasites, as well as a smaller number of upregulated sites that  
337 were only detectable when WNG1 was missing. These data suggest that another kinase is capable of  
338 phosphorylating a subset of sites on the IVN GRA proteins, and its activity may be partially  
339 compensating for WNG1 loss. Alternatively, this other kinase activity may be acting in competition with  
340 that of WNG1. It is possible that these novel sites are phosphorylated by another member of the WNG  
341 family. Regardless, the data we present here are consistent with a role for WNG1-mediated  
342 phosphorylation in the regulation of protein-protein and/or protein-membrane interactions of PV-  
343 resident proteins.

344 The multilamellar vesicles we observe in vacuoles deficient in WNG1 kinase activity are  
345 reminiscent of structures that have been previously observed during the first steps of IVN biogenesis  
346 (15). While non-phosphorylated, recombinantly-expressed GRA2 and GRA6 are sufficient to tubulate  
347 large unilamellar vesicles *in vitro* (19), it is possible that WNG1 kinase activity is required to ensure the  
348 efficiency of this process in cells. This may be explained by an apparent paradox that exists in GRA  
349 protein trafficking: GRA proteins that are destined to integrate into PV membranes traffic through the  
350 parasite secretory system as soluble entities (48–50), presumably in complex with an unknown  
351 solubilizing protein (Figure 9). Such a switch ensures that the parasite's intracellular and plasma  
352 membranes are protected from the tubulating activity of the GRA proteins. Removal of a solubilizing  
353 chaperone normally requires energy provided by ATP hydrolysis. There are no known chaperones  
354 secreted into the *Toxoplasma* PV. Consistent with a model in which WNG1 regulates membrane  
355 association of a subset of PV GRAs, we observed that each GRA4, GRA6, and GRA7 had were  
356 substantially more soluble in the vacuoles of parasites deficient in WNG1 kinase activity. There is thus  
357 an intriguing possibility that the ATP used during WNG-mediated phosphorylation is providing the  
358 energy to drive membrane insertion of a subset of GRA proteins (Figure 9). Such a non-canonical  
359 chaperoning mechanism is not without precedent. The mammalian neuropeptide 7B2 solubilizes the  
360 prohormone convertase 2 as it traffics to the Golgi (61), where 7B2 is phosphorylated by a resident  
361 kinase, resulting in release of the complex (62, 63).

362 In spite of decades of study, the *Toxoplasma* parasitophorous vacuole remains a mysterious  
363 organelle. The major function identified for IVN-associated proteins is in IVN biogenesis, as the  
364 deletion of either GRA2 or GRA6 results in a complete loss of the structure (45). Such IVN-deficient  
365 parasites have been used to link the IVN to nutrient uptake (16–18) and immune evasion (19, 21),  
366 though the precise mechanisms and roles of the IVN have not been established in these processes.  
367 Consistent with the pleiotropic effects of disrupting the IVN, knockout of IVN-associated proteins  
368 strongly attenuates parasite virulence (22, 64). Infection of mice with WNG1 knockout parasites yields  
369 a substantially reduced cyst burden (44), which is consistent with the role we observed for WNG1 in  
370 IVN biogenesis and stability and the likely resulting pleiotropic effects on the parasite's biology. Our  
371 discovery of potential regulatory phosphorylation may facilitate future work to associate specific GRA  
372 protein complexes with their biochemical functions and thus better delineate the roles of the IVN in  
373 parasite pathogenesis.

## 374 **Materials and Methods**

375 *Phylogenetic analysis* – Protein sequences for the WNG kinases were identified by using custom  
376 scripts that iteratively BLAST (65) the ToxoDBv24 collections for *Toxoplasma gondii*, *Neospora*

377 *caninum*, *Sarcocystis neurona*, *Eimeria spp.*, *Cystoisospora suis*, and *Cyclospora cayetanensis*.  
378 *Besnoitia besnoiti* sequences from the Uniprot nonredundant collection. Multiple sequence alignments  
379 were generated by MAFFT v7 (66), and manually edited as necessary. The maximum likelihood  
380 phylogenetic tree and bootstrap analysis (1000 replicates) were estimated using RAxML v8.1.17 (67),  
381 and the resulting tree was annotated using a script based on the jsPhyloSVG package (68) and  
382 Inkscape.

383 *PCR and plasmid generation* – All PCR was conducted using Phusion polymerase (NEB) using  
384 primers listed in Supplemental Table S10. Constructs were assembled using Gibson master mix  
385 (NEB). Point mutations were created by the Phusion mutagenesis protocol.

386 *Parasite culture and transfection* – Human foreskin fibroblasts (HFF) were grown in Dulbecco's  
387 modified Eagle's medium supplemented with 10% fetal bovine serum and 2 mM glutamine.  
388 *Toxoplasma* tachyzoites were maintained in confluent monolayers of HFF. Epitope-tagged and  
389 knockout parasites were generated by transfecting the RH $\Delta$ ku80 $\Delta$ hxgp $r$ t strain (69) with 15  $\mu$ g of  
390 linearized plasmid and selecting for HXGPRT expression, as previously described (70). The loxP-  
391 flanked HXGPRT selection cassette in knockout parasites was removed by transient transfection with  
392 a plasmid overexpressing Cre recombinase, and selecting with 6-thioxanthine. WNG1 complement  
393 parasites were created by targeting 3xHA-tagged WNG1 (either wild-type or kinase-dead) driven by its  
394 native promoter, together with a bleomycin resistance cassette, to the empty Ku80 locus, and  
395 selecting with bleomycin, as previously described (71).

396 *Immunofluorescence* – HFF cells were grown on coverslips in 24-well plates until confluent and  
397 were infected with parasites. The cells were rinsed twice with phosphate buffered saline (PBS), and  
398 were fixed with 4% paraformaldehyde (PFA)/4% sucrose in PBS at room temperature for 15 minutes.  
399 After two washes with PBS, cells were permeabilized with 0.01% Triton-X-100 for 10 minutes and  
400 washed 3x with PBS. After blocking in PBS + 3% BSA for 30 min, cells were incubated in primary  
401 antibody in blocking solution overnight at room temperature. Cells were then washed 3x with PBS and  
402 incubated with Alexa-fluor conjugated secondary antibodies (Molecular Probes) for 2 h. Cells were  
403 then washed 3x with PBS and then mounted with mounting medium containing DAPI (Vector  
404 Laboratories). Cells were imaged on a Nikon A1 Laser Scanning Confocal Microscope. Primary  
405 antibodies used in this study include rat anti-HA (Sigma; 1:500 dilution), mouse anti-GRA2 (BioVision;  
406 1:1000 dilution), mouse anti-GRA6 (gift of David Sibley; 1:1000 dilution), rabbit anti-ROP2 (1:10,000  
407 dilution).

408 *Protein purification* – BPK1 (residues 61-377 cloned into pGEX4T) was expressed as a GST  
409 fusion in *E. coli* Rosetta2(DE3) overnight at 16°C after induction with 300 mM IPTG. Cells were  
410 resuspended in 50 mM Tris 8.0, 200 mM NaCl, 1% Triton-X-100 and 0.2% sodium sarkosyl, lysed by  
411 sonication, and centrifuged at 27k rcf for 30 min. GST-fusion protein was affinity purified using  
412 glutathione sepharose, which was washed first with PBS containing 1% Triton-X-100, and then without  
413 detergent. Protein was eluted by overnight on-bead thrombin cleavage at 4°C overnight. BPK1 was  
414 further purified by anion exchange and size exclusion chromatography, where it was flash frozen in 10  
415 mM HEPES, pH 7.0, 100 mM NaCl for storage. Recombinant wild-type and mutant WNG1 (residues  
416 265-591; cloned into pET28) proteins were expressed N-terminally fused with His<sub>6</sub>-SUMO in *E. coli*  
417 Rosetta2(DE3) incubated overnight at 16°C after induction with 300 mM IPTG. Bacteria were lysed in  
418 50 mM HEPES 7.4, 500 mM NaCl, 15 mM Imidazole, lysed by sonication, and centrifuged as above.  
419 His<sub>6</sub>-fusion proteins were affinity purified using NiNTA resin, and eluted in 50 mM Tris, pH 7.0, 500 mM

420 NaCl, 250 mM imidazole and dialyzed in 20 mM Tris, pH 7.0, 300 mM NaCl before concentration and  
421 flash freezing for long-term storage.

422 *Protein crystallization* – Small hexagonal plates of BPK1 grew in a wide variety of conditions in  
423 initial screens. High quality crystals were seeded from initial hits grown in 0.2M Proline, 0.1M HEPES  
424 7.4, 10% PEG- 3350. To generate a platinum derivative, crystals were soaked with reservoir solution  
425 containing 10 mM  $K_2PtCl_4$  for 2 h and washed quickly in reservoir solution. All crystals were flash  
426 frozen in a cryoprotectant of reservoir with 25% ethylene glycol.

427 *Data collection, structure determination, and refinement* – The diffraction data for the native  
428 crystals were collected at beamline 19-ID at the Advanced Photon Source at a wavelength of 1.038 Å  
429 and a temperature of 100 K. Native crystals diffracted to 2.5 Å, though diffraction was highly  
430 anisotropic, ranging from 2.2 Å in the best dimension to 2.8 Å in the worst. Data for the platinum  
431 derivatives were collected in an inverse beam experiment at 1.07195 Å, 1.076276 Å, and 1.07229 Å,  
432 corresponding to peak, remote, and inflection wavelengths. Integration, indexing, and scaling of the  
433 diffraction data were performed using the HKL2000 suite of programs (72). Initial phases at 3.5 Å were  
434 determined by multiwavelength anomalous diffraction from the Pt datasets using the SHELX suite (73)  
435 and used to generate a starting model after density modification with the SOLVE/RESOLVE package  
436 (74, 75). The high resolution native data were incorporated for extension and map improvement in  
437 Phenix (76). Manual rebuilding in Coot (77) and refinement in Refmac5 (78), led to a final 2.5 Å  
438 structure of BPK1 (PDB accession: 6M7Z). The structure was evaluated with Molprobity (79).

439 *Homology modeling* – A model of the WNG1/ROP35 structure was created in Modeller v9.14 (80)  
440 using the BPK1 structure as a template and an alignment of BPK1 and WNG1 created using Clustal  
441 Omega (81).

442 *In vitro kinase assays* – The kinase assays comparing WT and mutant activities were run using 2  
443  $\mu$ M of His<sub>6</sub>sumo-WNG1, 4 mM MgCl<sub>2</sub>, 200  $\mu$ M cold ATP, 1mM DTT, 1mg/mL BSA, 10% glycerol, 300  
444 mM NaCl, 20 mM Hepes pH 7.5. Reactions were started by adding a hot ATP mix, that contained 10  
445  $\mu$ Ci  $\gamma$ [<sup>32</sup>P] ATP and 5  $\mu$ g MBP. The  $K_{M,ATP}$  kinase assays were run using the same mix as above except  
446 non-radioactive ATP was used in a range of concentrations from 1 mM to 32.5  $\mu$ M. The 25  $\mu$ L  
447 reactions were incubated at a 30°C water bath for 2 h. Reactions were stopped by adding 9  $\mu$ L 4x  
448 SDS-buffer. 20  $\mu$ L samples were then run on an SDS-PAGE gel. The gels were coomassie stained,  
449 the MBP band, excised and radioactivity quantified using a scintillation counter. All data were analyzed  
450 using GraphPad Prism 7.

451 *Cell culture, lysis and protein digestion for MS proteomics* – All reagents were obtained from  
452 Sigma-Aldrich unless specified otherwise. Parental (WT) and RH $\Delta$ wng1 *Toxoplasma* parasites were  
453 cultured in either ROK0 (light) or R10K8 (heavy) SILAC medium (Dundee Cell Products) for 8  
454 generations to ensure efficient heavy label incorporation. 24 h prior cell lysis human foreskin  
455 fibroblasts (HFFs) were infected (MOI=5) with WT or RH $\Delta$ wng1 parasites. Lysis was then performed in  
456 8 M urea, 75 mM NaCl, 50mM Tris, pH=8.2, supplemented with protease (complete mini tablets,  
457 Roche) and phosphatase (Phos Stop tablets, Roche) inhibitors followed by sonication to reduce  
458 sample viscosity (30 % duty cycle, 3  $\times$  30 sec bursts, on ice). Protein concentration was measured  
459 using BCA protein assay kit (Thermo Fisher Scientific) and equal amounts of heavy and light lysates  
460 mixed in 1:1 ratio. Lysates were subsequently reduced with 5 mM dithiothreitol (DTT) for 30 min at  
461 room temperature and alkylated with 14 mM iodoacetamide for 30 min at room temperature in the  
462 dark. Following quenching with 5 mM DTT for 15 min in the dark lysates were diluted with 50 mM



463 ammonium bicarbonate to reduce the concentration of urea to < 2M and digested with trypsin  
464 (Promega) overnight at 37 °C. After digestion samples were acidified with trifluoroacetic acid (TFA)  
465 (Thermo Fisher Scientific) to a final concentration of 1 % (v/v), all insoluble material was removed by  
466 centrifugation and the supernatant was desalted with Sep-Pak C18 cartridges (Waters). The samples  
467 were further digested with LysC (Promega) for 2-3 h at 37 °C and trypsin overnight at 37 °C followed  
468 by desalting with Sep-Pak as above.

469 *Phosphopeptide enrichment* – Desalted and vacuum dried samples were solubilized in 1 ml of  
470 loading buffer (80 % acetonitrile, 5 % TFA, 1 M glycolic acid) and mixed with 5 mg of TiO<sub>2</sub> beads  
471 (Titansphere, 5 µm GL Sciences Japan). Samples were incubated for 10 min with agitation followed by  
472 a 1 min 2000 × g spin to pellet the beads. The supernatant containing all non-phosphorylated peptides  
473 (total proteome) was removed and stored at -80 °C. The beads were washed with 150 µl of loading  
474 buffer followed by two additional wash steps, first with 150 µl 80 % acetonitrile, 1 % TFA and second  
475 with identical volume of 10 % acetonitrile, 0.2 % TFA. After each wash beads were pelleted by  
476 centrifugation (1 min at 2000 × g) and the supernatant discarded. The beads were dried in a vacuum  
477 centrifuge for 30 min followed by two elution steps at high pH. For the first elution step the beads were  
478 mixed with 100 µl of 1 % ammonium hydroxide (v/v) and for the second elution step with 100 µl of 5 %  
479 ammonium hydroxide (v/v). Each time the beads were incubated for 10 min with agitation and pelleted  
480 at 2000 × g for 1 min. The two elutions were combined and vacuum dried.

481 *Mass spectrometry sample fractionation and desalting* – Both phospho- and total proteome (40  
482 µg) samples were fractionated in a stage tip using Empore SDB-RPS discs (3M). Briefly, each stage  
483 tip was packed with one high performance extraction disc, samples were loaded in 100 µL of 1 % TFA,  
484 washed with 150 µL of 0.2 % TFA and eluted into 3 fractions with 100 µL of the following: 1) 100 mM  
485 ammonium formate, 20 % acetonitrile, 0.5 % formic acid; 2) 200 mM ammonium formate, 40 %  
486 acetonitrile, 0.5 % formic acid; 3) 5 % ammonium hydroxide, 60 % acetonitrile. The fractions were  
487 taken to dryness by vacuum centrifugation and further desalted on a stage tip using Empore C18 discs  
488 (3M). Briefly, each stage tip was packed with one C18 disc, conditioned with 100 µl of 100 %  
489 methanol, followed by 200 µl of 1 % TFA. The sample was loaded in 100 µL of 1 % TFA, washed 3  
490 times with 200 µl of 1 % TFA and eluted with 50 µl of 50 % acetonitrile, 5 % TFA. The desalted  
491 peptides were vacuum dried in preparation for LC-MS/MS analysis.

492 *nLC-MS/MS and data processing* – Samples were resuspended in 0.1 % TFA and loaded on a 50  
493 cm Easy Spray PepMap column (75 µm inner diameter, 2 µm particle size, ThermoFisher Scientific)  
494 equipped with an integrated electrospray emitter. Reverse phase chromatography was performed  
495 using the RSLC nano U3000 (Thermo Fisher Scientific) with a binary buffer system (solvent A: 0.1%  
496 formic acid, 5% DMSO; solvent B: 80% acetonitrile, 0.1% formic acid, 5% DMSO) at a flow rate of 250  
497 nl/min. The samples were run on a linear gradient of 2-35% B in 90 or 155 min with a total run time of  
498 120 or 180 min, respectively, including column conditioning. The nanoLC was coupled to a Q Exactive  
499 mass spectrometer using an EasySpray nano source (Thermo Fisher Scientific). The Q Exactive was  
500 operated in data-dependent mode acquiring HCD MS/MS scans (R=17,500) after an MS<sub>1</sub> scan (R=70,  
501 000) on the 10 most abundant ions using MS<sub>1</sub> target of 1 × 10<sup>6</sup> ions, and MS<sub>2</sub> target of 5 × 10<sup>4</sup> ions.  
502 The maximum ion injection time utilized for MS<sub>2</sub> scans was 120 ms, the HCD normalized collision  
503 energy was set at 28, the dynamic exclusion was set at 20 or 30 s for 120 and 180 min runs,  
504 respectively, and the peptide match and isotope exclusion functions were enabled. Raw data files  
505 were processed with MaxQuant (82) (version 1.5.0.25) and peptides were identified from the MS/MS



506 spectra searched against *Toxoplasma gondii* proteome (ToxoDB, 2017) using Andromeda (83) search  
507 engine. SILAC based experiments in MaxQuant were performed using the built-in quantification  
508 algorithm (82) with minimal ratio count = 1, enabled 'Match between runs' option for fractionated  
509 samples (time window 0.7 min) and 'Re-quantify' feature. Cysteine carbamidomethylation was  
510 selected as a fixed modification whereas methionine oxidation, acetylation of protein N-terminus and  
511 phosphorylation (S, T, Y) as variable modifications. The enzyme specificity was set to trypsin with  
512 maximum of 2 missed cleavages. The precursor mass tolerance was set to 20 ppm for the first search  
513 (used for mass re-calibration) and to 4.5 ppm for the main search. The datasets were filtered on  
514 posterior error probability to achieve 1% false discovery rate on protein, peptide and site level. "Unique  
515 and razor peptides" mode was selected to allow identification and quantification of proteins in groups  
516 (razor peptides are uniquely assigned to protein groups and not to individual proteins). Data were  
517 further analyzed as described in the Results section and in the Supplementary Table S4 using  
518 Microsoft Office Excel 2010 and Perseus (84) (version 1.5.0.9).

519 *Fractionation of PV membranes* – Highly infected monolayers of HFFs were rinsed twice with  
520 phosphate buffered saline (PBS) and harvested. PBS containing 1 mM EDTA with protease inhibitors  
521 were added to the cells, and cells were mechanically disrupted by passage through a 27 g needle.  
522 Proteins secreted in the PV were separated by a low speed (2500 g) spin, and the resulting  
523 supernatant (LSS) was further separated by ultracentrifugation at 50,000 rpm for 2 hours at 4 °C using  
524 TL100 rotor. The supernatant was aspirated as soluble fraction while the pellet was re-suspended in  
525 the same volume buffer. Equal volumes of each fraction were loaded on SDS-PAGE for analysis by  
526 western blot, which were quantified in ImageJ (85).

527 *Triton-X-114 partitioning* – The LSS fraction of infected monolayers was prepared as above, and  
528 further partitioned using a protocol modified as follows from (54). Pre-condensed Triton-X-114 was  
529 added to the LSS to make the final concentration of 2% Triton-X-114. After a few minutes incubation  
530 on ice, the solution was warmed at 30°C for 3 minutes, then centrifuged for 5 minutes at 4000 rpm at  
531 room temperature. The top aqueous layer was collected in another tube, and added the same volume  
532 of 10 mM Tris-HCl pH7.4, 150 mM NaCl with protease inhibitors. The cleared solution after placed in  
533 0°C for a few minutes was warmed at 30 °C again, and centrifuged again. The aqueous layer was  
534 separated from the detergent enriched fraction. After separation, Triton-X-114 and buffer were added,  
535 respectively, to the aqueous and detergent phases in order to obtain equal volumes and approximately  
536 the same salt and surfactant content for both samples.

537 *Western blotting* – Proteins were separated by SDS-PAGE and transferred to a PVDF membrane.  
538 Membranes were blocked for 1 hour in TBST + 3% milk, followed by overnight incubation at 4°C with  
539 primary antibody in blocking solution. The next day, membranes were washed 3× with TBST, followed  
540 by incubation at room temperature for 1-2 hours with HRP-conjugated secondary antibody (Sigma) in  
541 blocking buffer. After 3× washes with TBST, western blots were imaged using ECL Plus reagent  
542 (Pierce) on a GE ImageQuant LAS4000. Antibodies used in this study include: mouse anti-GRA1  
543 (BioVision; 1:1,000 dilution), mouse anti-GRA2 (BioVision; 1:1,000 dilution), mouse anti-GRA3 (gift of  
544 J-F Dubremetz; 1:2,000 dilution), mouse anti-GRA4 (gift of LD Sibley; 1:10,000 dilution), mouse anti-  
545 GRA5 (BioVision; 1:1,000 dilution), mouse anti-GRA6 (gift of LD Sibley; 1:10,000 dilution), rabbit anti-  
546 GRA7 (gift of LD Sibley; 1:10,000 dilution), rabbit anti-ROP2 (1:10,000 dilution), rat anti-HA (Sigma;  
547 1:500 dilution).

548 *Transmission electron microscopy* – Cells were fixed on MatTek dishes with 2.5% (v/v)

549 glutaraldehyde in 0.1M sodium cacodylate buffer. After three rinses in 0.1 M sodium cacodylate buffer,  
550 they were post-fixed with 1% osmium tetroxide and 0.8 %  $K_3[Fe(CN_6)]$  in 0.1 M sodium cacodylate  
551 buffer for 1 h at room temperature. Cells were rinsed with water and en bloc stained with 2% aqueous  
552 uranyl acetate overnight. After three rinses with water, specimens were dehydrated with increasing  
553 concentration of ethanol, infiltrated with Embed-812 resin and polymerized in a 70°C oven overnight.  
554 Blocks were sectioned with a diamond knife (Diatome) on a Leica Ultracut UC7 ultramicrotome (Leica  
555 Microsystems) and collected onto copper grids, post stained with 2% Uranyl acetate in water and lead  
556 citrate. Images were acquired on a Tecnai G2 spirit transmission electron microscope (FEI) equipped  
557 with a LaB<sub>6</sub> source at 120 kV. Images were analyzed and quantified using the Fiji distribution of  
558 ImageJ (85).

559 *Figure generation* – Structural models were generated using PyMOL v1.7 (86). Secondary  
560 structure cartoons in Figure 3 were generated using the Pro-origami web server (87). Data plotting  
561 and statistical analyses were conducted in Graphpad Prism v7.02. All figures were created in Inkscape  
562 v0.91.

### 563 **Acknowledgments**

564 MLR acknowledges funding from the Welch Foundation (I-1936-20170325) and NSF  
565 (MCB1553334). TB is funded, in part, by NIH training grant T32GM008203. MT was supported by  
566 awards of the United States NIH (NIH-R01AI123457) and The Francis Crick Institute  
567 (<https://www.crick.ac.uk/>), which receives its core funding from Cancer Research UK (FC001189;  
568 <https://www.cancerresearchuk.org/>), the UK Medical Research Council (FC001189;  
569 <https://www.mrc.ac.uk/>) and the Wellcome Trust (FC001189; <https://wellcome.ac.uk/>). DB  
570 acknowledges funding from the NIH (R01GM117080 and R21GM126406). We thank V. Tagliabracci  
571 and V. Muralidharan for helpful comments on the manuscript.

## References

1. Manning G, Whyte DB, Martinez R, Hunter T, Sudarsanam S. 2002. The Protein Kinase Complement of the Human Genome. *Science* 298:1912–1934.
2. Pappas G, Roussos N, Falagas ME. 2009. Toxoplasmosis snapshots: global status of *Toxoplasma gondii* seroprevalence and implications for pregnancy and congenital toxoplasmosis. *Int J Parasitol* 39:1385–1394.
3. Boothroyd JC, Dubremetz J-F. 2008. Kiss and spit: the dual roles of *Toxoplasma* rhoptries. *Nat Rev Microbiol* 6:79–88.
4. Hakimi M-A, Olias P, Sibley LD. 2017. *Toxoplasma* Effectors Targeting Host Signaling and Transcription. *Clin Microbiol Rev* 30:615–645.
5. Peixoto L, Chen F, Harb OS, Davis PH, Beiting DP, Brownback CS, Ouloguem D, Roos DS. 2010. Integrative genomic approaches highlight a family of parasite-specific kinases that regulate host responses. *Cell Host Microbe* 8:208–218.
6. Boothroyd JC. 2013. Have it your way: how polymorphic, injected kinases and pseudokinases enable *Toxoplasma* to subvert host defenses. *PLoS Pathog* 9:e1003296.
7. Mordue DG, Håkansson S, Niesman I, Sibley LD. 1999. *Toxoplasma gondii* resides in a vacuole that avoids fusion with host cell endocytic and exocytic vesicular trafficking pathways. *Exp Parasitol* 92:87–99.
8. Hunn JP, Feng CG, Sher A, Howard JC. 2011. The immunity-related GTPases in mammals: a fast-evolving cell-autonomous resistance system against intracellular pathogens. *Mamm Genome Off J Int Mamm Genome Soc* 22:43–54.
9. Clough B, Wright JD, Pereira PM, Hirst EM, Johnston AC, Henriques R, Frickel E-M. 2016. K63-

Linked Ubiquitination Targets *Toxoplasma gondii* for Endo-lysosomal Destruction in IFN $\gamma$ -Stimulated Human Cells. *PLoS Pathog* 12:e1006027.

10. Etheridge RD, Alaganan A, Tang K, Lou HJ, Turk BE, Sibley LD. 2014. The *Toxoplasma* pseudokinase ROP5 forms complexes with ROP18 and ROP17 kinases that synergize to control acute virulence in mice. *Cell Host Microbe* 15:537–550.
11. Reese ML, Shah N, Boothroyd JC. 2014. The *Toxoplasma* Pseudokinase ROP5 Is an Allosteric Inhibitor of the Immunity-related GTPases. *J Biol Chem* 289:27849–27858.
12. Franco M, Panas MW, Marino ND, Lee M-CW, Buchholz KR, Kelly FD, Bednarski JJ, Sleckman BP, Pourmand N, Boothroyd JC. 2016. A Novel Secreted Protein, MYR1, Is Central to *Toxoplasma*'s Manipulation of Host Cells. *mBio* 7:e02231-15.
13. Schwab JC, Beckers CJ, Joiner KA. 1994. The parasitophorous vacuole membrane surrounding intracellular *Toxoplasma gondii* functions as a molecular sieve. *Proc Natl Acad Sci U S A* 91:509–513.
14. Gold DA, Kaplan AD, Lis A, Bett GCL, Rosowski EE, Cirelli KM, Bougdour A, Sidik SM, Beck JR, Lourido S, Egea PF, Bradley PJ, Hakimi M-A, Rasmusson RL, Saeij JPJ. 2015. The *Toxoplasma* Dense Granule Proteins GRA17 and GRA23 Mediate the Movement of Small Molecules between the Host and the Parasitophorous Vacuole. *Cell Host Microbe* 17:642–652.
15. Sibley LD, Niesman IR, Parmley SF, Cesbron-Delauw MF. 1995. Regulated secretion of multi-lamellar vesicles leads to formation of a tubulo-vesicular network in host-cell vacuoles occupied by *Toxoplasma gondii*. *J Cell Sci* 108 ( Pt 4):1669–1677.
16. Coppens I, Dunn JD, Romano JD, Pypaert M, Zhang H, Boothroyd JC, Joiner KA. 2006. *Toxoplasma gondii* sequesters lysosomes from mammalian hosts in the vacuolar space. *Cell* 125:261–274.

17. Romano JD, Sonda S, Bergbower E, Smith ME, Coppens I. 2013. *Toxoplasma gondii* salvages sphingolipids from the host Golgi through the rerouting of selected Rab vesicles to the parasitophorous vacuole. *Mol Biol Cell* 24:1974–1995.
18. Dou Z, McGovern OL, Cristina MD, Carruthers VB. 2014. *Toxoplasma gondii* Ingests and Digests Host Cytosolic Proteins. *mBio* 5:e01188-14.
19. Lopez J, Bittame A, Massera C, Vasseur V, Effantin G, Valat A, Buailon C, Allart S, Fox BA, Rommereim LM, Bzik DJ, Schoehn G, Weissenhorn W, Dubremetz J-F, Gagnon J, Mercier C, Cesbron-Delauw M-F, Blanchard N. 2015. Intravacuolar Membranes Regulate CD8 T Cell Recognition of Membrane-Bound *Toxoplasma gondii* Protective Antigen. *Cell Rep* 13:2273–2286.
20. Reese ML, Boothroyd JC. 2009. A helical membrane-binding domain targets the *Toxoplasma* ROP2 family to the parasitophorous vacuole. *Traffic* 10:1458–1470.
21. Fentress SJ, Steinfeldt T, Howard JC, Sibley LD. 2012. The arginine-rich N-terminal domain of ROP18 is necessary for vacuole targeting and virulence of *Toxoplasma gondii*. *Cell Microbiol* 14:1921–1933.
22. Mercier C, Howe DK, Mordue D, Lingnau M, Sibley LD. 1998. Targeted disruption of the GRA2 locus in *Toxoplasma gondii* decreases acute virulence in mice. *Infect Immun* 66:4176–4182.
23. Treeck M, Sanders JL, Elias JE, Boothroyd JC. 2011. The phosphoproteomes of *Plasmodium falciparum* and *Toxoplasma gondii* reveal unusual adaptations within and beyond the parasites' boundaries. *Cell Host Microbe* 10:410–419.
24. Saeij JPJ, Coller S, Boyle JP, Jerome ME, White MW, Boothroyd JC. 2007. *Toxoplasma* co-opts host gene expression by injection of a polymorphic kinase homologue. *Nature* 445:324–327.
25. Reese ML, Zeiner GM, Saeij JPJ, Boothroyd JC, Boyle JP. 2011. Polymorphic family of injected pseudokinases is paramount in *Toxoplasma* virulence. *Proc Natl Acad Sci U S A* 108:9625–9630.



26. Bradley PJ, Sibley LD. 2007. Rhoptries: an arsenal of secreted virulence factors. *Curr Opin Microbiol* 10:582–587.
27. Jones NG, Wang Q, Sibley LD. 2016. Secreted Protein Kinases Regulate Cyst Burden During Chronic Toxoplasmosis. *Cell Microbiol*.
28. Walker JE, Saraste M, Runswick MJ, Gay NJ. 1982. Distantly related sequences in the alpha- and beta-subunits of ATP synthase, myosin, kinases and other ATP-requiring enzymes and a common nucleotide binding fold. *EMBO J* 1:945–951.
29. Hanks SK, Hunter T. 1995. Protein kinases 6. The eukaryotic protein kinase superfamily: kinase (catalytic) domain structure and classification. *FASEB J Off Publ Fed Am Soc Exp Biol* 9:576–596.
30. Buchholz KR, Bowyer PW, Boothroyd JC. 2013. Bradyzoite pseudokinase 1 is crucial for efficient oral infectivity of the *Toxoplasma gondii* tissue cyst. *Eukaryot Cell* 12:399–410.
31. Talevich E, Kannan N. 2013. Structural and evolutionary adaptation of rhoptry kinases and pseudokinases, a family of coccidian virulence factors. *BMC Evol Biol* 13:117.
32. Fox BA, Sanders KL, Rommereim LM, Guevara RB, Bzik DJ. 2016. Secretion of Rhoptry and Dense Granule Effector Proteins by Nonreplicating *Toxoplasma gondii* Uracil Auxotrophs Controls the Development of Antitumor Immunity. *PLoS Genet* 12:e1006189.
33. Ossorio PN, Schwartzman JD, Boothroyd JC. 1992. A *Toxoplasma gondii* rhoptry protein associated with host cell penetration has unusual charge asymmetry. *Mol Biochem Parasitol* 50:1–15.
34. Brennan DF, Dar AC, Hertz NT, Chao WCH, Burlingame AL, Shokat KM, Barford D. 2011. A Raf-induced allosteric transition of KSR stimulates phosphorylation of MEK. *Nature* 472:366–369.
35. Murphy JM, Czabotar PE, Hildebrand JM, Lucet IS, Zhang J-G, Alvarez-Diaz S, Lewis R, Lalaoui

- N, Metcalf D, Webb AI, Young SN, Varghese LN, Tannahill GM, Hatchell EC, Majewski IJ, Okamoto T, Dobson RCJ, Hilton DJ, Babon JJ, Nicola NA, Strasser A, Silke J, Alexander WS. 2013. The pseudokinase MLKL mediates necroptosis via a molecular switch mechanism. *Immunity* 39:443–453.
36. Zhang H, Zhu Q, Cui J, Wang Y, Chen MJ, Guo X, Tagliabracci VS, Dixon JE, Xiao J. 2018. Structure and evolution of the Fam20 kinases. *Nat Commun* 9:1218.
37. Zhu Q, Venzke D, Walimbe AS, Anderson ME, Fu Q, Kinch LN, Wang W, Chen X, Grishin NV, Huang N, Yu L, Dixon JE, Campbell KP, Xiao J. 2016. Structure of protein O-mannose kinase reveals a unique active site architecture. *eLife* 5.
38. Murphy JM, Zhang Q, Young SN, Reese ML, Bailey FP, Evers PA, Ungureanu D, Hammaren H, Silvennoinen O, Varghese LN, Chen K, Tripaydonis A, Jura N, Fukuda K, Qin J, Nimchuk Z, Mudgett MB, Elowe S, Gee CL, Liu L, Daly RJ, Manning G, Babon JJ, Lucet IS. 2014. A robust methodology to subclassify pseudokinases based on their nucleotide-binding properties. *Biochem J* 457:323–334.
39. Levinson NM, Kuchment O, Shen K, Young MA, Koldobskiy M, Karplus M, Cole PA, Kuriyan J. 2006. A Src-like inactive conformation in the abl tyrosine kinase domain. *PLoS Biol* 4:e144.
40. Ruff EF, Muretta JM, Thompson AR, Lake EW, Cyphers S, Albanese SK, Hanson SM, Behr JM, Thomas DD, Chodera JD, Levinson NM. 2018. A dynamic mechanism for allosteric activation of Aurora kinase A by activation loop phosphorylation. *eLife* 7.
41. Huang H, Zeqiraj E, Dong B, Jha BK, Duffy NM, Orlicky S, Thevakumaran N, Talukdar M, Pillon MC, Ceccarelli DF, Wan LCK, Juang Y-C, Mao DY, Gaughan C, Brinton MA, Perelygin AA, Kourinov I, Guarné A, Silverman RH, Sicheri F. 2014. Dimeric structure of pseudokinase RNase L bound to 2-5A reveals a basis for interferon-induced antiviral activity. *Mol Cell* 53:221–234.

42. Rudolf AF, Skovgaard T, Knapp S, Jensen LJ, Berthelsen J. 2014. A comparison of protein kinases inhibitor screening methods using both enzymatic activity and binding affinity determination. *PLoS One* 9:e98800.
43. Yoshida T, Kakizuka A, Imamura H. 2016. BTeam, a Novel BRET-based Biosensor for the Accurate Quantification of ATP Concentration within Living Cells. *Sci Rep* 6:39618.
44. Fox BA, Rommereim LM, Guevara RB, Falla A, Hortua Triana MA, Sun Y, Bzik DJ. 2016. The *Toxoplasma gondii* Rhoptry Kinome Is Essential for Chronic Infection. *mBio* 7.
45. Mercier C, Dubremetz J-F, Rauscher B, Lecordier L, Sibley LD, Cesbron-Delauw M-F. 2002. Biogenesis of nanotubular network in *Toxoplasma parasitophorous* vacuole induced by parasite proteins. *Mol Biol Cell* 13:2397–2409.
46. Treeck M, Sanders JL, Gaji RY, LaFavers KA, Child MA, Arrizabalaga G, Elias JE, Boothroyd JC. 2014. The calcium-dependent protein kinase 3 of *Toxoplasma* influences basal calcium levels and functions beyond egress as revealed by quantitative phosphoproteome analysis. *PLoS Pathog* 10:e1004197.
47. Nadipuram SM, Kim EW, Vashisht AA, Lin AH, Bell HN, Coppens I, Wohlschlegel JA, Bradley PJ. 2016. In Vivo Biotinylation of the *Toxoplasma Parasitophorous* Vacuole Reveals Novel Dense Granule Proteins Important for Parasite Growth and Pathogenesis. *mBio* 7.
48. Labruyere E, Lingnau M, Mercier C, Sibley LD. 1999. Differential membrane targeting of the secretory proteins GRA4 and GRA6 within the parasitophorous vacuole formed by *Toxoplasma gondii*. *Mol Biochem Parasitol* 102:311–324.
49. Lecordier L, Mercier C, Sibley LD, Cesbron-Delauw MF. 1999. Transmembrane insertion of the *Toxoplasma gondii* GRA5 protein occurs after soluble secretion into the host cell. *Mol Biol Cell* 10:1277–1287.

50. Mercier C, Cesbron-Delauw MF, Sibley LD. 1998. The amphipathic alpha helices of the toxoplasma protein GRA2 mediate post-secretory membrane association. *J Cell Sci* 111 ( Pt 15):2171–2180.
51. Jacobs D, Dubremetz JF, Loyens A, Bosman F, Saman E. 1998. Identification and heterologous expression of a new dense granule protein (GRA7) from *Toxoplasma gondii*. *Mol Biochem Parasitol* 91:237–249.
52. Carey KL, Donahue CG, Ward GE. 2000. Identification and molecular characterization of GRA8, a novel, proline-rich, dense granule protein of *Toxoplasma gondii*. *Mol Biochem Parasitol* 105:25–37.
53. Ossorio PN, Dubremetz JF, Joiner KA. 1994. A soluble secretory protein of the intracellular parasite *Toxoplasma gondii* associates with the parasitophorous vacuole membrane through hydrophobic interactions. *J Biol Chem* 269:15350–15357.
54. Bordier C. 1981. Phase separation of integral membrane proteins in Triton X-114 solution. *J Biol Chem* 256:1604–1607.
55. Gendrin C, Bittame A, Mercier C, Cesbron-Delauw M-F. 2010. Post-translational membrane sorting of the *Toxoplasma gondii* GRA6 protein into the parasite-containing vacuole is driven by its N-terminal domain. *Int J Parasitol* 40:1325–1334.
56. Travier L, Mondragon R, Dubremetz J-F, Musset K, Mondragon M, Gonzalez S, Cesbron-Delauw M-F, Mercier C. 2008. Functional domains of the *Toxoplasma* GRA2 protein in the formation of the membranous nanotubular network of the parasitophorous vacuole. *Int J Parasitol* 38:757–773.
57. Middelbeek J, Clark K, Venselaar H, Huynen MA, van Leeuwen FN. 2010. The alpha-kinase family: an exceptional branch on the protein kinase tree. *Cell Mol Life Sci CMLS* 67:875–890.
58. Vaillancourt JP, Lyons C, Côté GP. 1988. Identification of two phosphorylated threonines in the tail region of *Dictyostelium* myosin II. *J Biol Chem* 263:10082–10087.

59. Yamaguchi H, Matsushita M, Nairn AC, Kuriyan J. 2001. Crystal structure of the atypical protein kinase domain of a TRP channel with phosphotransferase activity. *Mol Cell* 7:1047–1057.
60. Drennan D, Ryazanov AG. 2004. Alpha-kinases: analysis of the family and comparison with conventional protein kinases. *Prog Biophys Mol Biol* 85:1–32.
61. Lee S-N, Lindberg I. 2008. 7B2 prevents unfolding and aggregation of prohormone convertase 2. *Endocrinology* 149:4116–4127.
62. Lee S-N, Hwang JR, Lindberg I. 2006. Neuroendocrine protein 7B2 can be inactivated by phosphorylation within the secretory pathway. *J Biol Chem* 281:3312–3320.
63. Ramos-Molina B, Lindberg I. 2015. Phosphorylation and Alternative Splicing of 7B2 Reduce Prohormone Convertase 2 Activation. *Mol Endocrinol Baltim Md* 29:756–764.
64. Craver MPJ, Knoll LJ. 2007. Increased efficiency of homologous recombination in *Toxoplasma gondii* dense granule protein 3 demonstrates that GRA3 is not necessary in cell culture but does contribute to virulence. *Mol Biochem Parasitol* 153:149–157.
65. Camacho C, Coulouris G, Avagyan V, Ma N, Papadopoulos J, Bealer K, Madden TL. 2009. BLAST+: architecture and applications. *BMC Bioinformatics* 10:421.
66. Katoh K, Standley DM. 2013. MAFFT multiple sequence alignment software version 7: improvements in performance and usability. *Mol Biol Evol* 30:772–780.
67. Stamatakis A. 2014. RAxML version 8: a tool for phylogenetic analysis and post-analysis of large phylogenies. *Bioinforma Oxf Engl* 30:1312–1313.
68. Smits SA, Ouverney CC. 2010. jsPhyloSVG: a javascript library for visualizing interactive and vector-based phylogenetic trees on the web. *PLoS One* 5:e12267.
69. Huynh M, Carruthers VB. 2009. Tagging of endogenous genes in a *Toxoplasma gondii* strain



lacking Ku80. *Eukaryot Cell* 8:530–9.

70. Donald RG, Carter D, Ullman B, Roos DS. 1996. Insertional tagging, cloning, and expression of the *Toxoplasma gondii* hypoxanthine-xanthine-guanine phosphoribosyltransferase gene. Use as a selectable marker for stable transformation. *J Biol Chem* 271:14010–14019.
71. Soldati D, Kim K, Kampmeier J, Dubremetz JF, Boothroyd JC. 1995. Complementation of a *Toxoplasma gondii* ROP1 knock-out mutant using phleomycin selection. *Mol Biochem Parasitol* 74:87–97.
72. Otwinowski Z, Minor W. 1997. Processing of X-ray diffraction data collected in oscillation mode. *Methods Enzymol* 276:307–326.
73. Sheldrick GM. 2008. A short history of SHELX. *Acta Crystallogr A* 64:112–122.
74. Terwilliger TC, Berendzen J. 1999. Automated MAD and MIR structure solution. *Acta Crystallogr D Biol Crystallogr* 55:849–861.
75. Terwilliger T. 2004. SOLVE and RESOLVE: automated structure solution, density modification and model building. *J Synchrotron Radiat* 11:49–52.
76. Adams PD, Afonine PV, Bunkóczi G, Chen VB, Davis IW, Echols N, Headd JJ, Hung L-W, Kapral GJ, Grosse-Kunstleve RW, McCoy AJ, Moriarty NW, Oeffner R, Read RJ, Richardson DC, Richardson JS, Terwilliger TC, Zwart PH. 2010. PHENIX: a comprehensive Python-based system for macromolecular structure solution. *Acta Crystallogr D Biol Crystallogr* 66:213–221.
77. Emsley P, Lohkamp B, Scott WG, Cowtan K. 2010. Features and development of Coot. *Acta Crystallogr D Biol Crystallogr* 66:486–501.
78. Winn MD, Murshudov GN, Papiz MZ. 2003. Macromolecular TLS refinement in REFMAC at moderate resolutions. *Methods Enzymol* 374:300–321.

79. Chen VB, Arendall WB, Headd JJ, Keedy DA, Immormino RM, Kapral GJ, Murray LW, Richardson JS, Richardson DC. 2009. *MolProbity*: all-atom structure validation for macromolecular crystallography. *Acta Crystallogr D Biol Crystallogr* 66:12–21.
80. Sali A, Blundell TL. 1993. Comparative protein modelling by satisfaction of spatial restraints. *J Mol Biol* 234:779–815.
81. Sievers F, Wilm A, Dineen D, Gibson TJ, Karplus K, Li W, Lopez R, McWilliam H, Remmert M, Söding J, Thompson JD, Higgins DG. 2011. Fast, scalable generation of high-quality protein multiple sequence alignments using Clustal Omega. *Mol Syst Biol* 7:539.
82. Cox J, Mann M. 2008. MaxQuant enables high peptide identification rates, individualized p.p.b.-range mass accuracies and proteome-wide protein quantification. *Nat Biotechnol* 26:1367–1372.
83. Cox J, Neuhauser N, Michalski A, Scheltema RA, Olsen JV, Mann M. 2011. Andromeda: a peptide search engine integrated into the MaxQuant environment. *J Proteome Res* 10:1794–1805.
84. Tyanova S, Temu T, Sinitcyn P, Carlson A, Hein MY, Geiger T, Mann M, Cox J. 2016. The Perseus computational platform for comprehensive analysis of (prote)omics data. *Nat Methods* 13:731–740.
85. Schindelin J, Arganda-Carreras I, Frise E, Kaynig V, Longair M, Pietzsch T, Preibisch S, Rueden C, Saalfeld S, Schmid B, Tinevez J-Y, White DJ, Hartenstein V, Eliceiri K, Tomancak P, Cardona A. 2012. Fiji: an open-source platform for biological-image analysis. *Nat Methods* 9:676–682.
86. Schrödinger, LLC. 2015. The PyMOL Molecular Graphics System, Version 1.7.
87. Stivala A, Wybrow M, Wirth A, Whisstock JC, Stuckey PJ. 2011. Automatic generation of protein structure cartoons with Pro-origami. *Bioinforma Oxf Engl* 27:3315–3316.

Figure 1

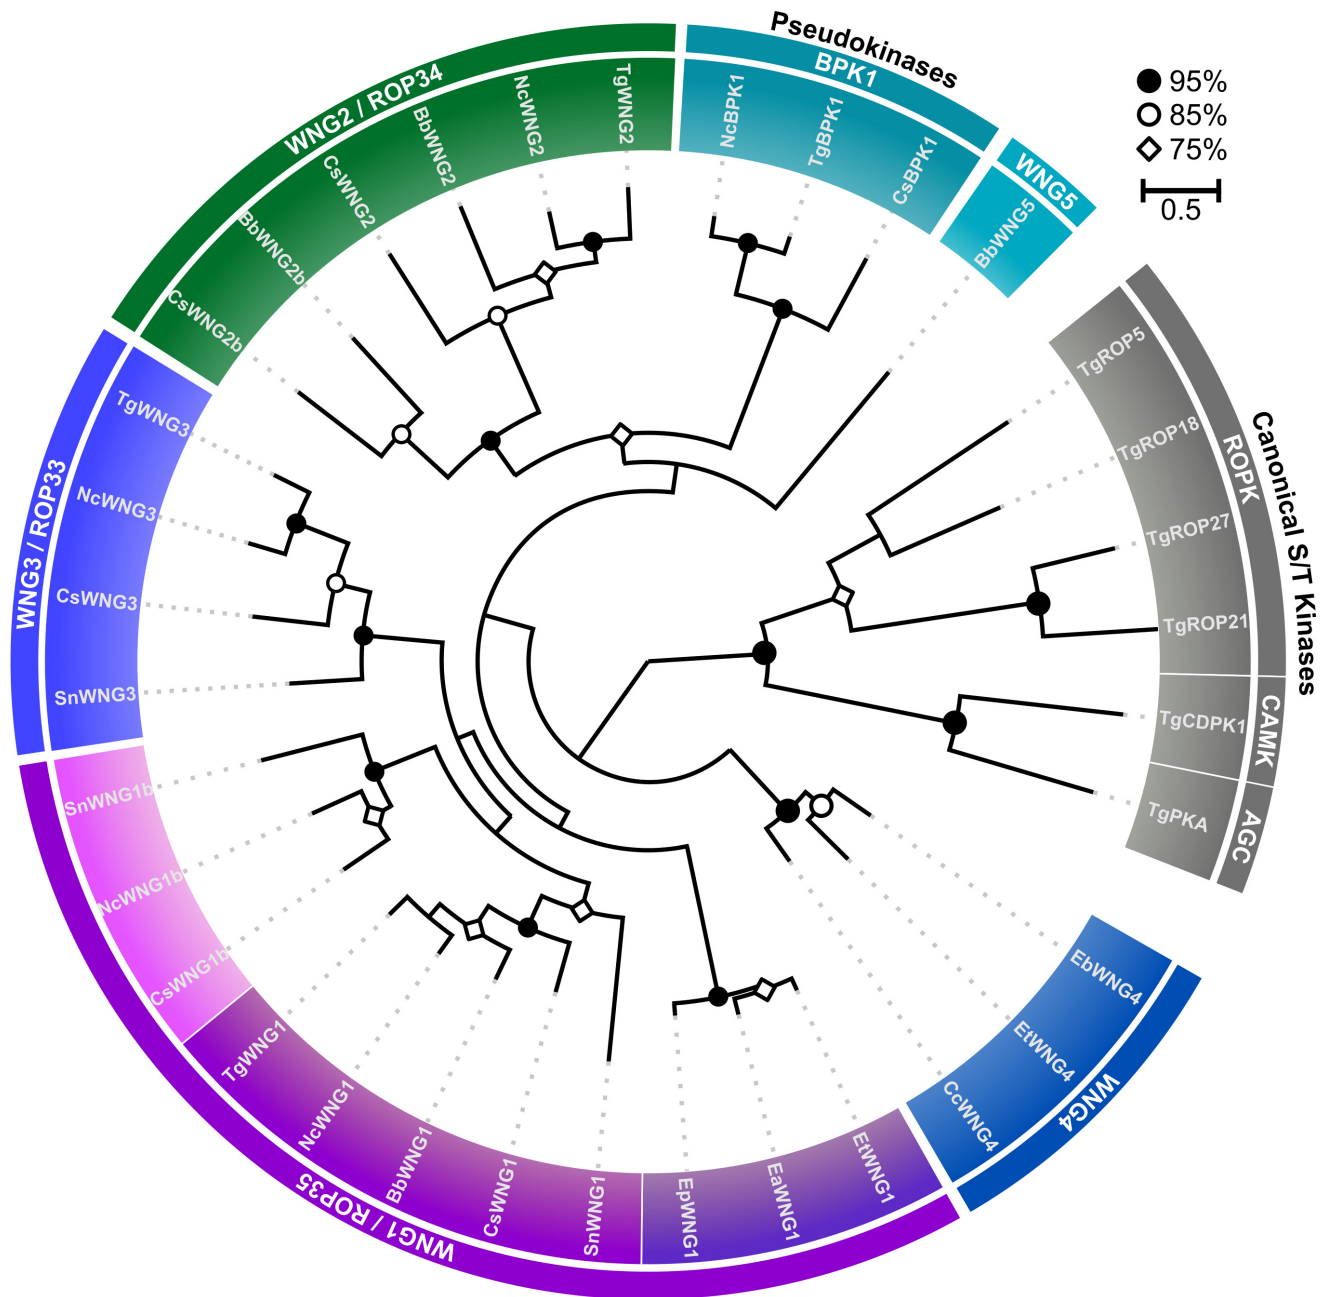

**Figure 1: The WNG kinases comprise a phylogenetic clade that is distinct from canonical protein kinases.** A maximum-likelihood phylogenetic tree estimated from the multiple sequence alignment of the indicated kinases. Bootstrap values are indicated as black circles (>95%); white circles (>85%); and white diamonds (>75%). Species: *Tg* – *Toxoplasma gondii*; *Nc* – *Neospora caninum*; *Bb* – *Besnoitia besnoiti*; *Sn* – *Sarcocystis neurona*; *Ea/Ep/Et* – *Eimeria* spp.; *Cs* – *Cystoisospora suis*; *Cc* – *Cyclospora cayetanensis*.



### Supplemental Table S1c

| Name    | Organism                       | Subfamily | Gene Model/Accession | Alternative gene model |
|---------|--------------------------------|-----------|----------------------|------------------------|
| CsBPK1  | <i>Cystoisospora suis</i>      | BPK1      | CSUI_010109          |                        |
| HhBPK1  | <i>Hammondia hammondi</i>      | BPK1      | HHA_253330           |                        |
| NcBPK1  | <i>Neospora caninum</i>        | BPK1      | NCLIV_007770         |                        |
| TgBPK1  | <i>Toxoplasma gondii</i>       | BPK1      | TGGT1_253330         |                        |
| BbWNG1  | <i>Besnoitia besnoiti</i>      | WNG1      | PFH36021.1           |                        |
| CsWNG1  | <i>Cystoisospora suis</i>      | WNG1      | CSUI_009154          |                        |
| CsWNG1b | <i>Cystoisospora suis</i>      | WNG1      | CSUI_010099          |                        |
| EaWNG1  | <i>Eimeria acervulina</i>      | WNG1      | EAH_00045380         |                        |
| EbWNG1  | <i>Eimeria brunetti</i>        | WNG1      | EBH_0002260          |                        |
| EpWNG1  | <i>Eimeria praecox</i>         | WNG1      | EPH_0003380          |                        |
| EtWNG1  | <i>Eimeria tenella</i>         | WNG1      | ETH_00005905         |                        |
| HhWNG1  | <i>Hammondia hammondi</i>      | WNG1      | HHA_304740           |                        |
| NcWNG1  | <i>Neospora caninum</i>        | WNG1      | NCLIV_044410         |                        |
| NcWNG1b | <i>Neospora caninum</i>        | WNG1      | NCLIV_029900         |                        |
| SnWNG1  | <i>Sarcocystic neurona</i>     | WNG1      | SN3_00501335         | SRCN_2183              |
| SnWNG1b | <i>Sarcocystic neurona</i>     | WNG1      | SRCN_2123            |                        |
| TgWNG1  | <i>Toxoplasma gondii</i>       | WNG1      | TGGT1_304740         |                        |
| BbWNG2  | <i>Besnoitia besnoiti</i>      | WNG2      | PFH32376.1           |                        |
| BbWNG2b | <i>Besnoitia besnoiti</i>      | WNG2      | PFH32362.1           |                        |
| CsWNG2  | <i>Cystoisospora suis</i>      | WNG2      | CSUI_004303          |                        |
| HhWNG2  | <i>Hammondia hammondi</i>      | WNG2      | HHA_240090           |                        |
| NcWNG2  | <i>Neospora caninum</i>        | WNG2      | NCLIV_000650         |                        |
| TgWNG2  | <i>Toxoplasma gondii</i>       | WNG2      | TGGT1_240090         |                        |
| CsWNG2b | <i>Cystoisospora suis</i>      | WNG2b     | CSUI_008294          |                        |
| CsWNG3  | <i>Cystoisospora suis</i>      | WNG3      | CSUI_002921          |                        |
| HhWNG3  | <i>Hammondia hammondi</i>      | WNG3      | HHA_201130           |                        |
| NcWNG3  | <i>Neospora caninum</i>        | WNG3      | NCLIV_023260         |                        |
| SnWNG3  | <i>Sarcocystic neurona</i>     | WNG3      | SRCN_4310            | SRCN_7082              |
| TgWNG3  | <i>Toxoplasma gondii</i>       | WNG3      | TGGT1_201130         |                        |
| CcWNG4  | <i>Cyclospora cayetanensis</i> | WNG4      | cyc_03158            |                        |
| EaWNG4  | <i>Eimeria acervulina</i>      | WNG4      | EAH_00050320         |                        |
| EbWNG4  | <i>Eimeria brunetti</i>        | WNG4      | EBH_0025260          |                        |
| EtWNG4  | <i>Eimeria tenella</i>         | WNG4      | ETH_00026495         |                        |
| BbWNG5  | <i>Besnoitia besnoiti</i>      | WNG5      | PFH31612.1           |                        |

**Table S1c:** Gene models (for sequences in ToxoDB) or NCBI accession numbers of sequences used in this study.



**Figure 2**

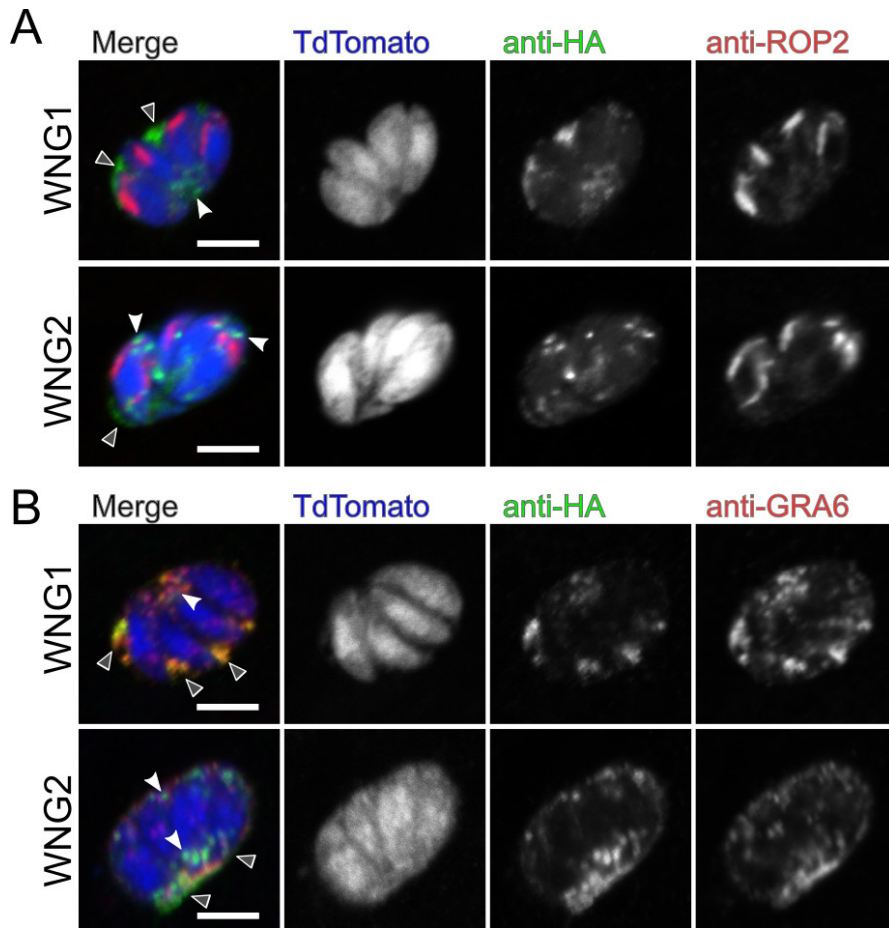

**Figure 2: WNG kinases are secreted into the PV lumen from the dense granules.** 0.5  $\mu\text{m}$  confocal slices of WNG1-3xHA or WNG2-3xHA infected cells transiently transfected with TdTomato (blue) and stained with anti-HA (green) and either (A) the rhoptry marker anti-ROP2 (red) or (B) the dense granular/IVN marker anti-GRA6 (red). White arrowheads indicate intracellular signal; Gray arrowheads indicate secreted, PV-localized signal. Scale bars: 5  $\mu\text{m}$ .

**Figure 3**

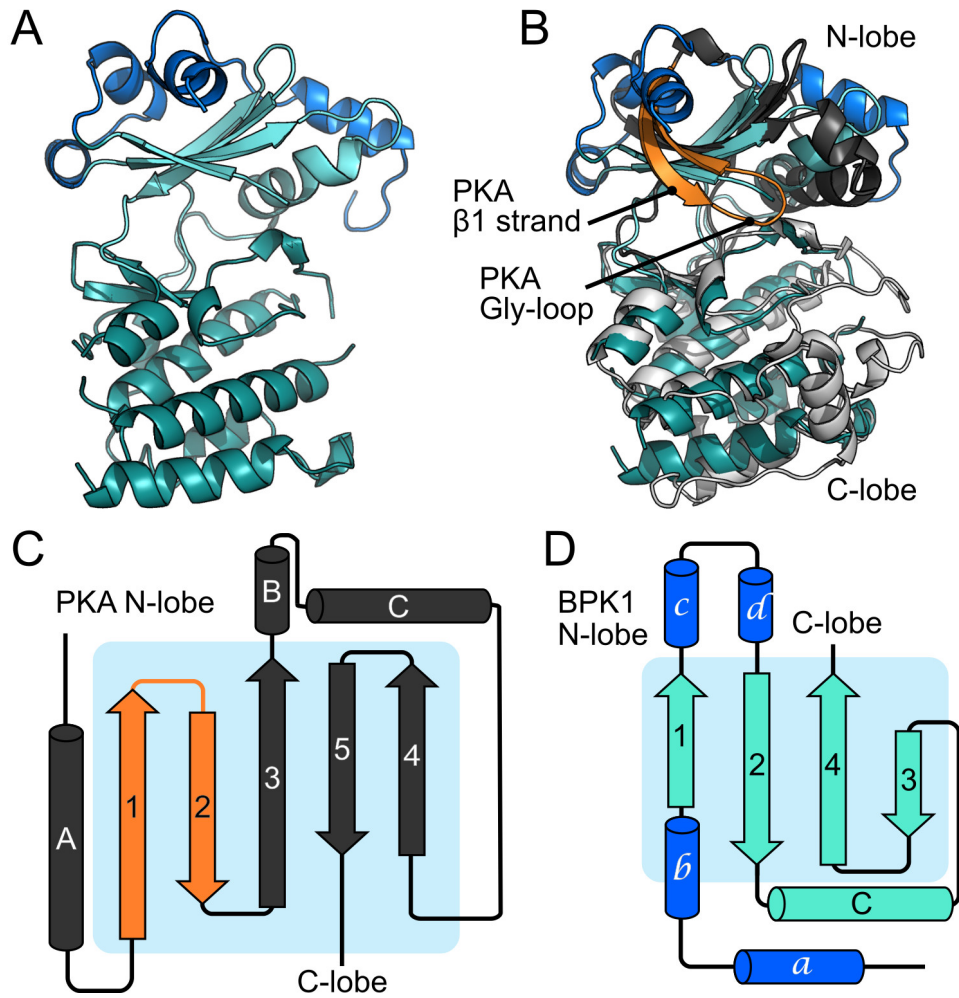

**Figure 3: The structure of TgBPK1 reveals an atypical kinase fold lacking the Gly-loop.** (A) Stereo view of the TgBPK1 structure. The N-lobe is in cyan, C-lobe colored in teal, and the helical “lid” that is unique to the WNG family is colored blue. (B) Superposition of the TgBPK1 structure with that of PKA (1ATP). TgBPK1 is colored as in (A). The N-lobe of PKA is dark gray, C-lobe is light gray, and  $\beta$ -strands that sandwich the Gly-loop are orange. Cartoon highlighting the differences between the N-lobes of (C) PKA and (D) TgBPK1, colored as in (B). Note the difference in the order of the N-lobe  $\beta$ -strands in PKA versus TgBPK1.

### Supplemental Figure S3

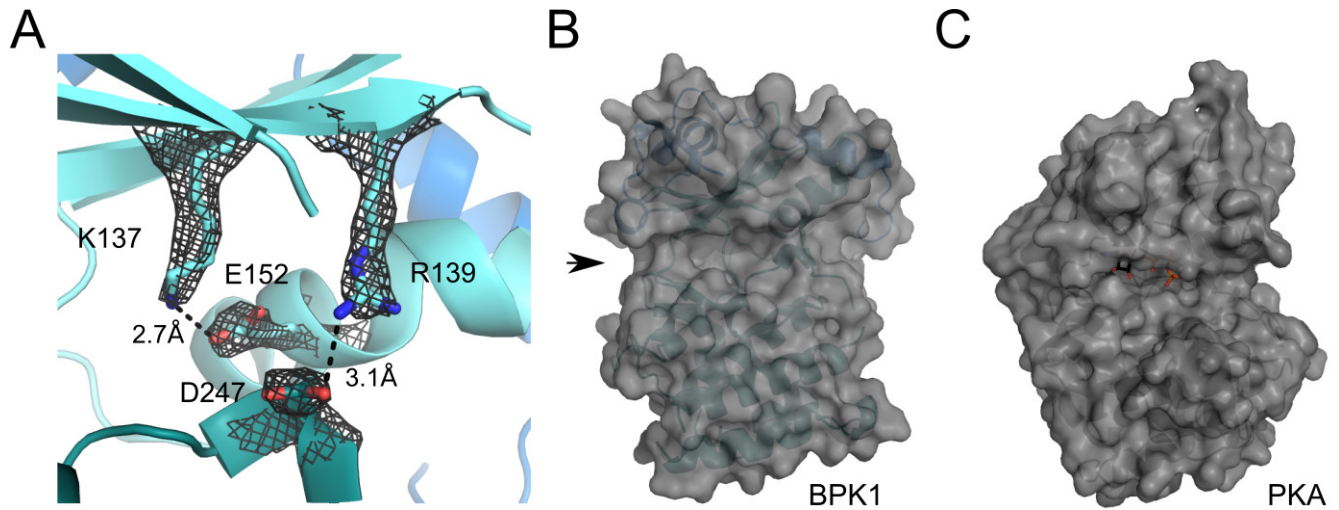

**Figure S3: BPK1 has a divergent, open active site.** (A) BPK1 active site superposed with the  $2F_o - F_c$  electron density map contoured at  $2\sigma$ . Two salt bridges are highlighted as sticks: the conserved bridge between the  $\alpha C$  E152 and the VAIK K137 as well as an unusual, WNG family-specific salt bridge between R139 and D247 (an acidic substitution at the DFG Gly position). The lack of Gly-loop creates an open active site in BPK1, indicated with an arrow in (B). This is compared to the more restricted active site in canonical kinases such as PKA, shown in (C). Note that the two kinases are shown in equivalent orientations.

**Table 1: Crystallographic Data and Refinement**

|                                      | TgBPK1 (native)                  |                              | TgBPK1 (Pt)                      |                              |
|--------------------------------------|----------------------------------|------------------------------|----------------------------------|------------------------------|
| <b>Data collection</b>               |                                  |                              |                                  |                              |
| Space group                          | P2 <sub>1</sub> 2 <sub>1</sub> 2 |                              | P2 <sub>1</sub> 2 <sub>1</sub> 2 |                              |
| Cell dimensions                      |                                  |                              |                                  |                              |
| <i>a</i> , <i>b</i> , <i>c</i> (Å)   | 171.47, 123.07, 86.62            |                              | 184.77, 120.98, 92.36            |                              |
| $\alpha$ , $\beta$ , $\gamma$ (°)    | 90, 90, 90                       |                              | 90, 90, 90                       |                              |
|                                      |                                  | Peak                         | Inflection                       | Remote                       |
| Wavelength (Å)                       | 1.038                            | 1.07195                      | 1.07229                          | 1.076276                     |
| Resolution (Å)                       | 47.7 – 2.50 (2.59 – 2.50)        | 50.0 – 3.75<br>(3.81 – 3.75) | 50.0 – 3.73<br>(3.79 – 3.73)     | 50.0 – 3.92<br>(3.92 – 3.92) |
| Total reflections                    | 512518                           | 130864                       | 110497                           | 105514                       |
| $R_{\text{merge}}$                   | 9.1 (86.3)                       | 8.3 (1.0)                    | 7.4 (88.2)                       | 8.6 (96.6)                   |
| $CC_{1/2}$ (final shell)             | 0.76                             | 0.63                         | 0.70                             | 0.75                         |
| $I / I\sigma$                        | 23.8 (2.0)                       | 25.2 (1.8)                   | 25.3 (2.0)                       | 24.4 (2.2)                   |
| †Completeness (%)                    | 90.9 (63.5)                      | 90.3 (61.1)                  | 87.2 (63)                        | 89.8 (60.2)                  |
| Redundancy                           | 8.0 (7.3)                        | 6.0 (6.1)                    | 5.0 (5.1)                        | 6.0 (5.9)                    |
| <b>Refinement</b>                    |                                  |                              |                                  |                              |
| No. reflections                      | 58472 (4024)                     |                              |                                  |                              |
| $R_{\text{free}}$ reflections        | 2987 (203)                       |                              |                                  |                              |
| $R_{\text{work}} / R_{\text{free}}$  | 0.197 / 0.238<br>(0.238 / 0.289) |                              |                                  |                              |
| No. atoms                            |                                  |                              |                                  |                              |
| Protein                              | 12422                            |                              |                                  |                              |
| Ligand/ion                           | 64 (EDO), 3 (CL)                 |                              |                                  |                              |
| Water                                | 381                              |                              |                                  |                              |
| <i>B</i> -factors                    |                                  |                              |                                  |                              |
| Protein                              | 45.58                            |                              |                                  |                              |
| Ligand/ion                           | 47.55                            |                              |                                  |                              |
| Water                                | 33.12                            |                              |                                  |                              |
| R.m.s. deviations                    |                                  |                              |                                  |                              |
| Bond lengths (Å)                     | 0.010                            |                              |                                  |                              |
| Bond angles (°)                      | 1.37                             |                              |                                  |                              |
| Ramachandran<br>(favored/disallowed) | 98.48 / 0                        |                              |                                  |                              |
| Molprobity score                     | 1.14                             |                              |                                  |                              |
| Molprobity clash<br>score            | 3.48                             |                              |                                  |                              |
| No. TLS groups                       | 20 per chain                     |                              |                                  |                              |

†Diffraction was anisotropic, which reduced the completeness, especially in highest resolution shell; for instance, for the native dataset diffraction was measured to 2.2 Å in the strongest dimension and 2.8 Å in the weakest.

**Figure 4**

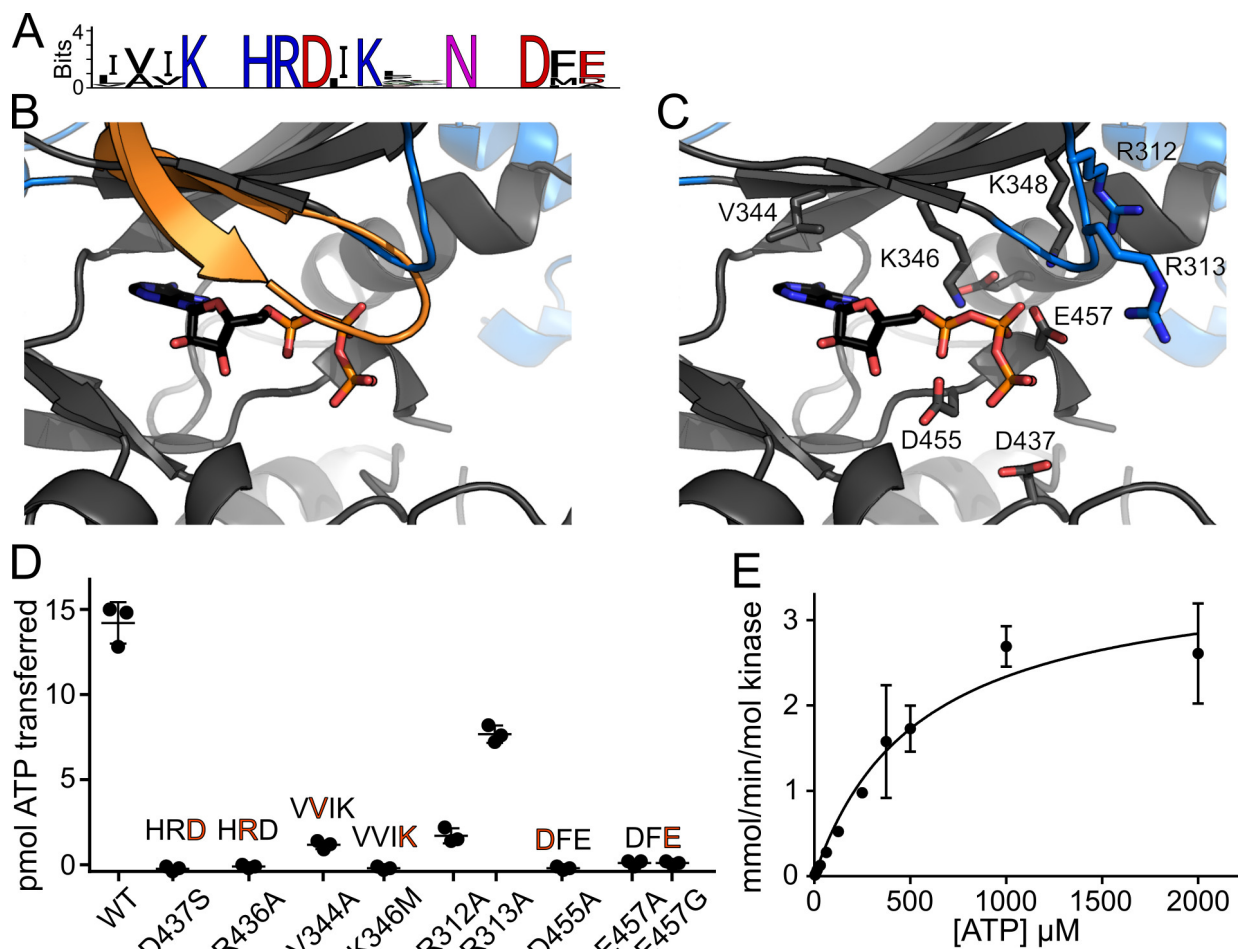

**Figure 4: WNG1 has adapted its active site to catalyze phosphoryl transfer without a Gly-loop.**

(A) Sequence logos of the WNG kinase VAIK, HRD, and DFG motifs indicate conservation of critical catalytic residues. (B) A homology model of the WNG1 structure based on the BPK1 crystal structure, (gray and blue) has been superimposed with the structure of PKA (1.96Å backbone rmsd; 529 atoms compared). For clarity, only the PKA Gly-loop (orange) and bound nucleotide are shown. (C) A model of the WNG1 active site structure, colored as in (B). Bound ATP has been modeled based on superposition of the PKA structure. Residues that comprise either canonical motifs or WNG-specific substitutions are annotated and shown as sticks. (D) Kinase activities of wild-type WNG1 and the indicated mutant proteins using MBP as a protein substrate, quantified by  $^{32}$ P scintillation. Motifs altered by the mutants are shown above the data points. (E) A representative Michaelis-Menten fit of *in vitro* kinase assays of WNG1 using MBP as a substrate while varying ATP concentration.





**Figure 5**

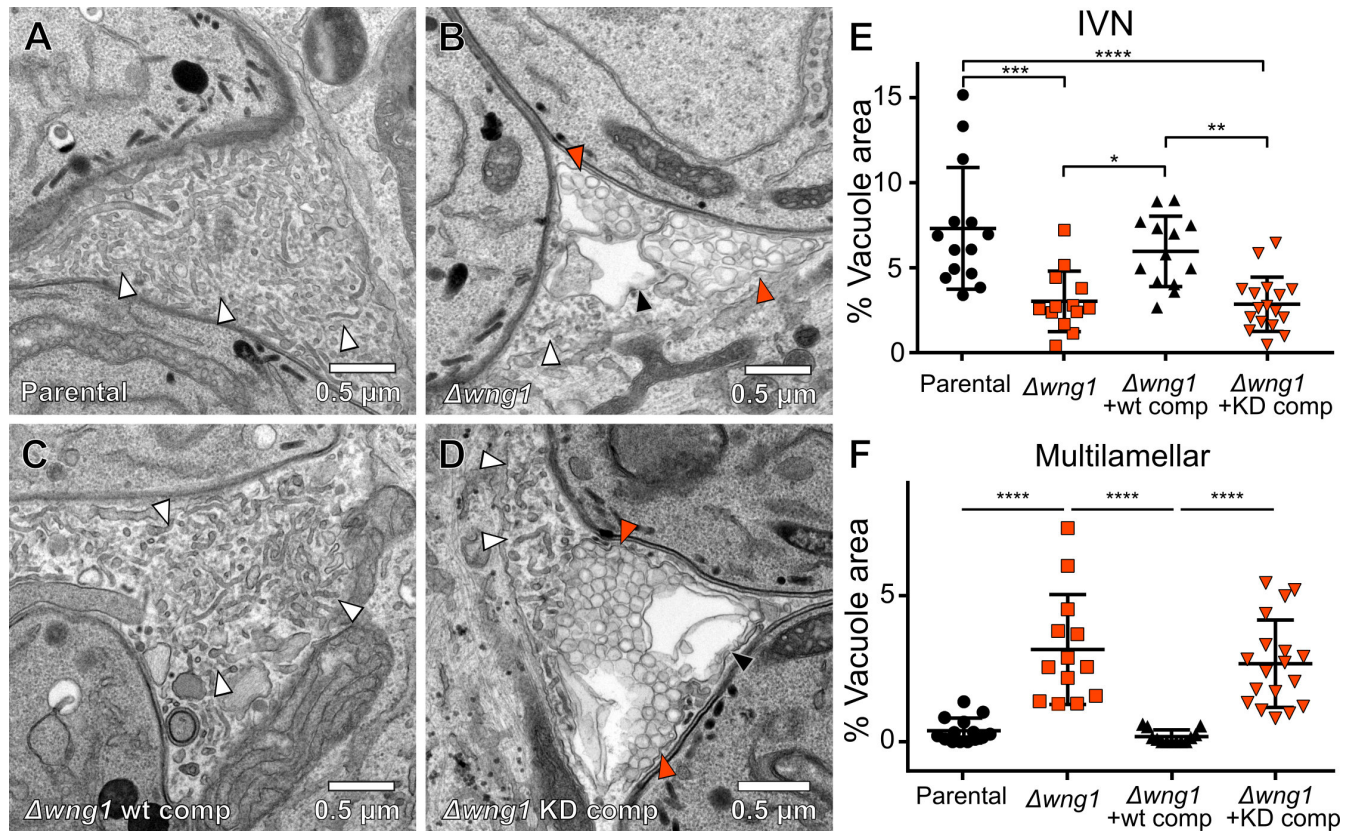

**Figure 5: Vacuoles lacking active WNG1 kinase show disrupted IVN membranes.** Representative transmission electron microscopic images of the (A) Parental, (B)  $\Delta wng1$ , (C)  $\Delta wng1$  complemented with wild-type WNG1, and (D) kinase-dead complemented strains. IVN tubules are indicated with white arrowheads. Multilamellar vesicles are indicated with solid orange arrowheads. Multilamellar structures in which internal vesicles appear to have been lost during fixation are indicated with a black arrowhead in (B) and (D). The relative area of each IVN tubules and multilamellar vacuole from EM images as in (A-D) were quantified in ImageJ. Significance was calculated in Prism by ANOVA;  $p < 0.0001$  (\*\*\*\*);  $p < 0.001$  (\*\*\*);  $p < 0.01$  (\*\*);  $p < 0.05$  (\*).

## Supplemental Figure S5a

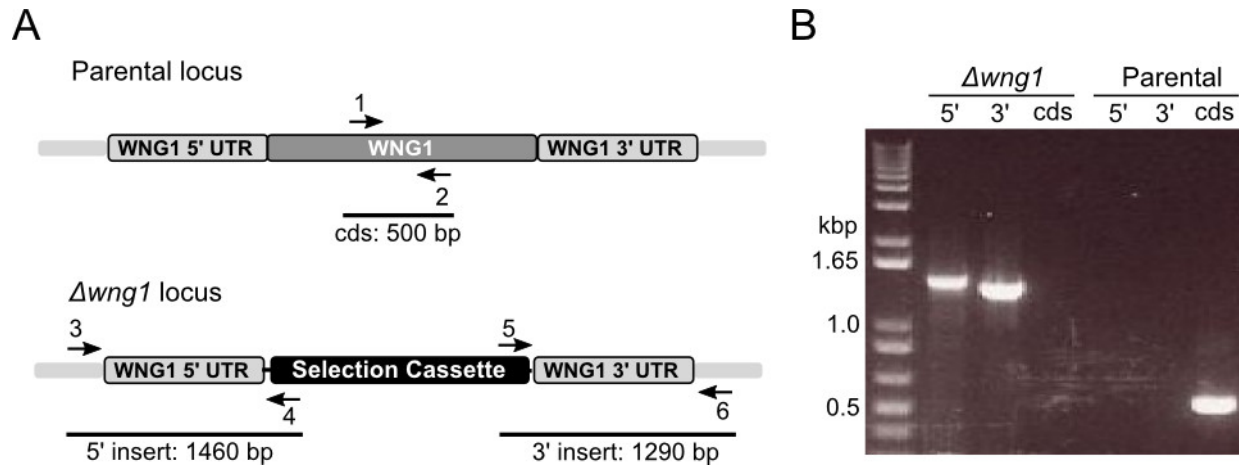

**Figure S5a: Generation of WNG1 knockout parasites.** RH $\Delta wng1$  parasites were generated by double homologous recombination in which the WNG1 genomic sequence was replaced by a HXGPRT selection cassette. (A) Cartoon of parental and knockout loci indicating binding sites for primers used to verify knockout. (B) PCR demonstrating insertion of selection cassette and loss of coding sequence (cds) in knockout parasites. Primers sequences are listed in Supplemental Table S10.

### Supplemental Figure S5b

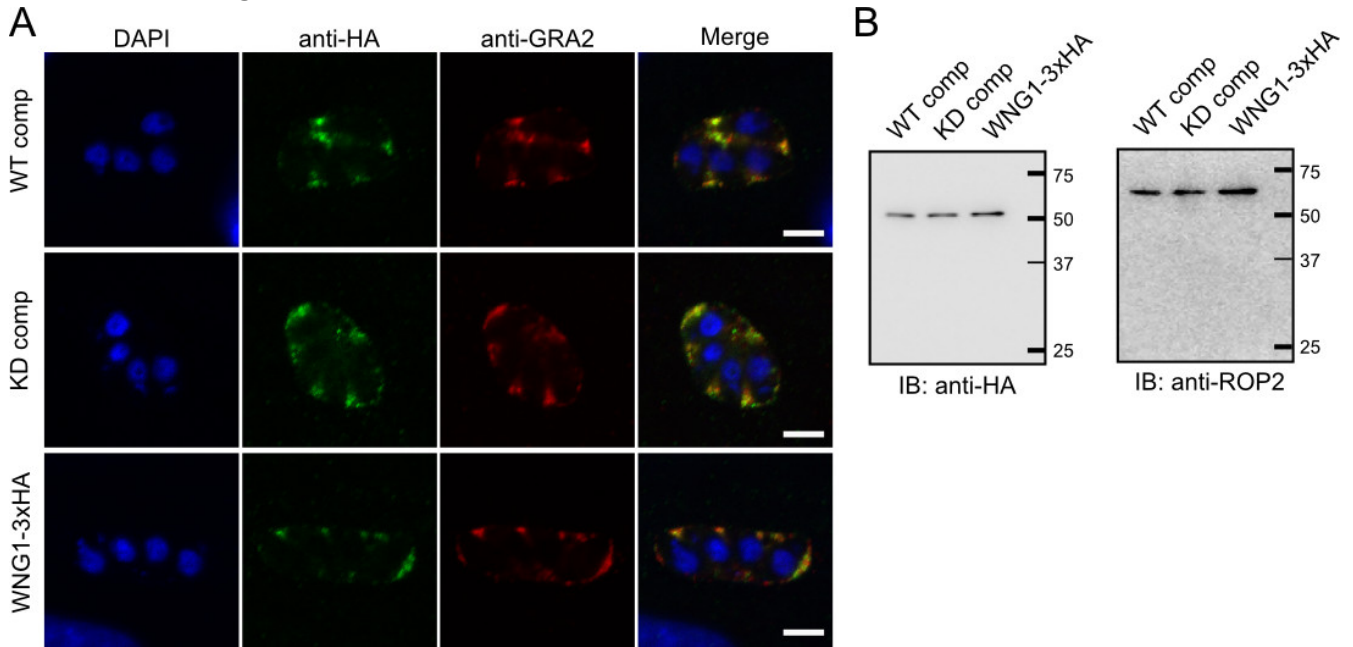

**Figure S5b: WNG1 complements faithfully localize to dense granules and PV.** (A) 0.5  $\mu$ m confocal slices of the wild-type (WT) and kinase-dead (KD) WNG1 complemented parasites as well as the endogenously tagged WNG1-3xHA were stained with DAPI (blue), anti-HA (green), and the dense granule and IVN marker GRA2 (red). (B) Both the WT and KD WNG1-complements are expressed at similar levels to the endogenously 3xHA tagged protein, as demonstrated by western blot, using ROP2 as a loading control.



### Supplemental Figure S5c

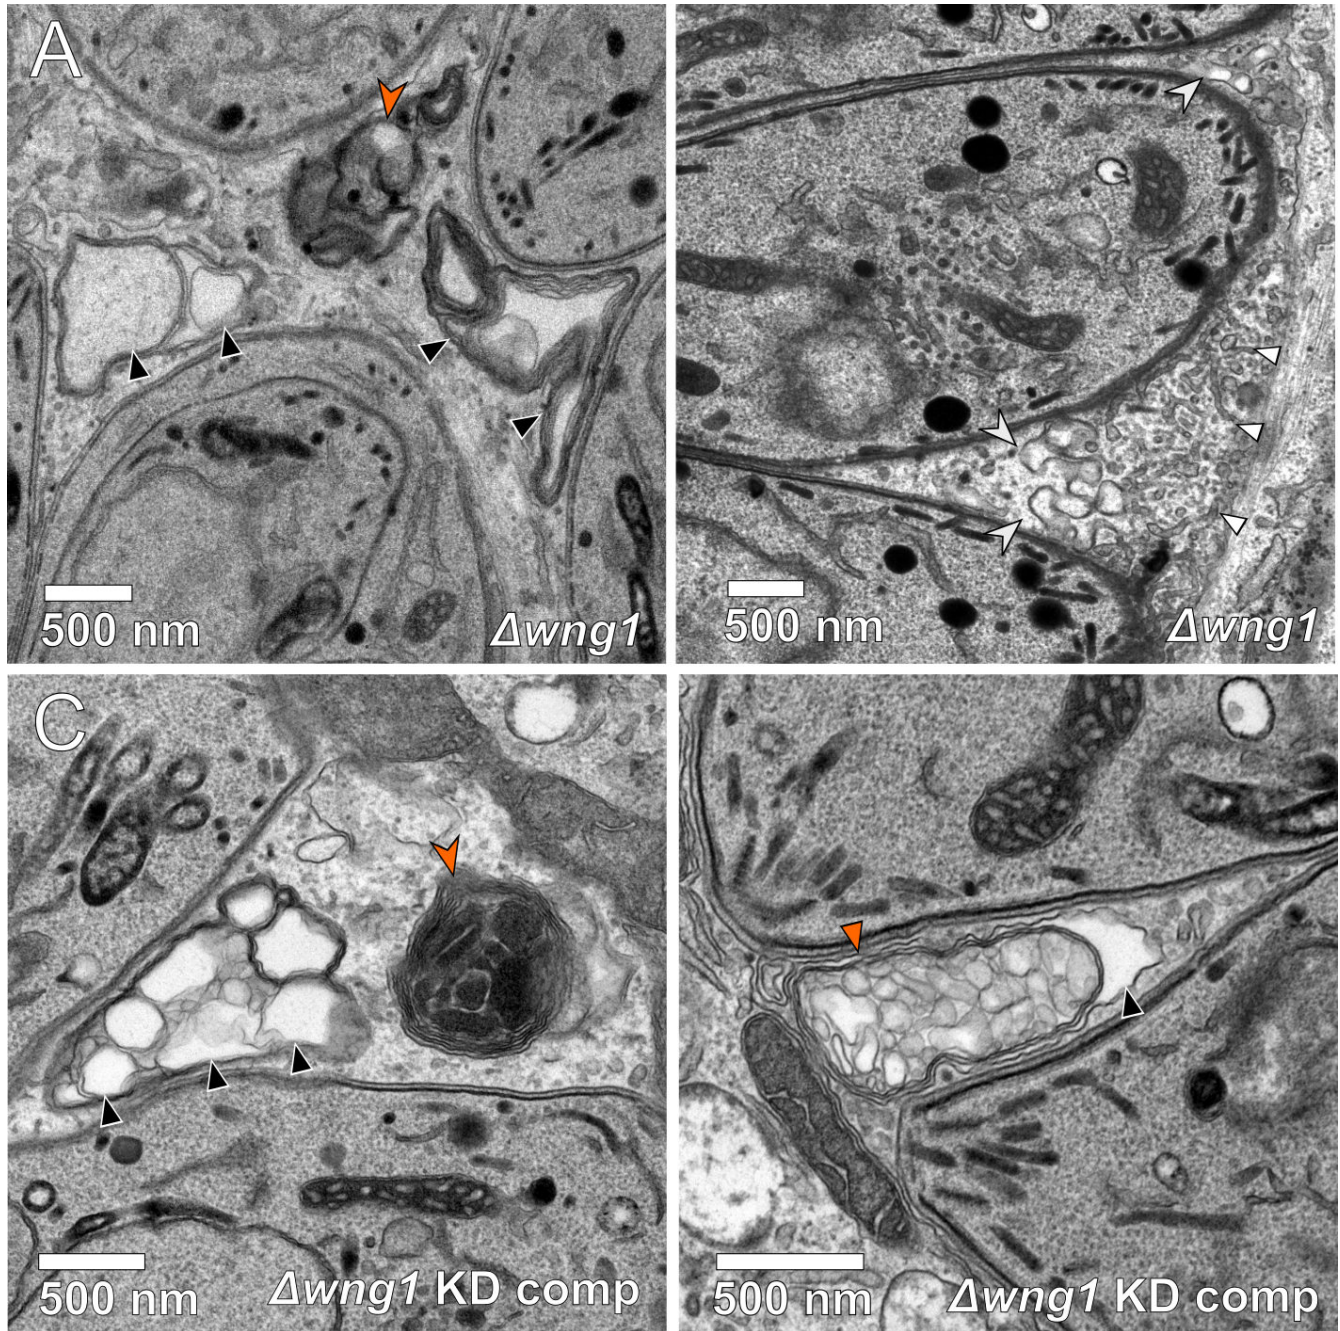

**Figure S5c:** Unusual membrane structures in vacuoles lacking active WNG1 kinase. Representative transmission electron microscopic images of (A,B) RH $\Delta wng1$  and (C,D) RH $\Delta wng1$  complemented with kinase-dead WNG1. IVN tubules are indicated with small white triangles. Multilamellar vesicles are indicated with small solid orange triangles. Multilamellar structures in which internal vesicles appear to have been lost during fixation or to have collapsed into sheets are indicated with black triangles. Electron dense multilamellar structures are indicated with large orange arrowheads in (A) and (C). Membrane “whorls” that appear connected with IVN tubules are indicated with large white arrowheads in (B).



**Figure 6**

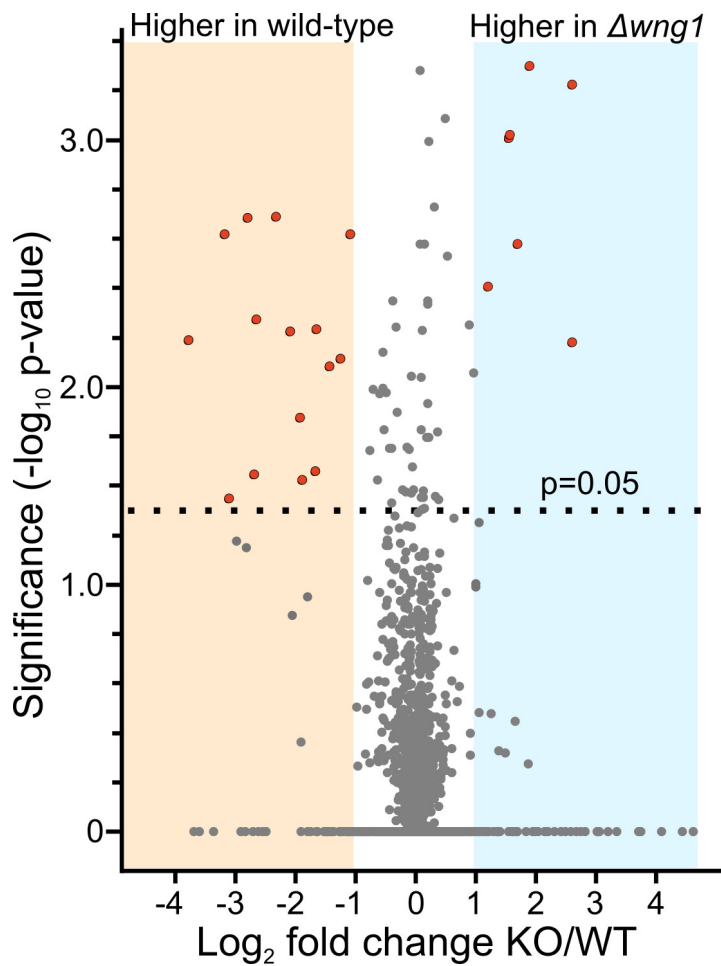

**Figure 6: Overview of quantitative phosphoproteomics data.** SILAC quantification of change in phosphosite abundance plotted against significance of change for 2296 phosphosites in RH $\Delta$ *wng1* versus parental parasites. See Supplementary Table 5 for full data set. Significantly changing phosphosites ( $p$ -value < 0.05 and  $-1 < \log_2 \text{ change} < 1$ ) enriched in dense granule proteins are highlighted.

**Table 2**

| Gene Model   | Name  | Site   | Context                                | Localization         |
|--------------|-------|--------|----------------------------------------|----------------------|
| TGGT1_227620 | GRA2  | S56    | PEE <b>PV</b> <b>S</b> QRASR           | IVN membrane (50)    |
|              |       | S72    | GKGE <b>H</b> <b>T</b> PPLPD           |                      |
| TGGT1_203310 | GRA3  | S120   | KVEEL <b>S</b> LLRRR                   | PV/IVN membrane (53) |
| TGGT1_286450 | GRA5  | S108*  | EESKE <b>S</b> A <b>T</b> AEE          | PV/IVN membrane (49) |
|              |       | T110   | SK <b>E</b> SA <b>T</b> AEEEE          |                      |
| TGGT1_286450 | GRA6  | S112   | ANEGK <b>S</b> EARGP                   | IVN membrane (56)    |
|              |       | S118   | EARGP <b>S</b> LEERI                   |                      |
|              |       | T128*  | IEEQG <b>T</b> RRRYS                   |                      |
| TGGT1_203310 | GRA7  | S41    | DDELM <b>S</b> RIRNS                   | PV/IVN membrane (51) |
|              |       | S77    | SMDKA <b>S</b> VESQL                   |                      |
|              |       | S227   | QEVPE <b>S</b> GEDGE                   |                      |
| TGGT1_254720 | GRA8  | S198   | PRMGP <b>S</b> DI <b>S</b> TH          | PV/IVN membrane (52) |
|              |       | S201   | GP <b>S</b> DI <b>S</b> <b>T</b> HVRG  |                      |
|              |       | T202   | P <b>S</b> DIS <b>T</b> HV <b>R</b> GA |                      |
| TGGT1_226380 | GRA35 | S85*   | RYGEA <b>S</b> VDDTQ                   | PV/IVN (47)          |
| TGGT1_236890 | GRA37 | S72    | TVRKQ <b>S</b> NDADG                   | PV/IVN (47)          |
| TGGT1_254000 | GRA44 | S420*  | DAKER <b>S</b> HAS <b>E</b> D          | PV/IVN (this study)  |
|              |       | S423   | ER <b>S</b> HA <b>S</b> EDEDD          |                      |
| TGGT1_267740 | GRA45 | S186** | EAE <b>L</b> I <b>S</b> LSPGG          | PV/IVN (this study)  |

\* Not significant in t-test due to variability between replicates (p>0.05) or quantified in only one type of labeling (Rv samples only)

\*\* Identified in preliminary dataset, not statistically significant in final data

**Table 2: Phosphosites lost in RHΔwng1 vacuoles.** The sequence context of each of the phosphosites is indicated. Acidic residues are red, basic residues are blue. Note that some regions appear to be hyperphosphorylated in a WNG1-dependent manner. Such potential priming sites are indicated bolded with a gray background in the phosphosite context.

**Table 3**

| Gene Model   | Name  | Site | Context               |
|--------------|-------|------|-----------------------|
| TGGT1_286450 | GRA6  | S133 | TRRRY <b>S</b> SVQEP  |
| TGGT1_203310 | GRA7  | T70* | TDDHL <b>T</b> TSMDK  |
|              |       | S80* | KASVE <b>S</b> QLPRR  |
|              |       | T90  | REPLE <b>T</b> EPDEQ  |
|              |       | T112 | SDAEV <b>T</b> DDNIY  |
|              |       | T121 | IYEEH <b>T</b> DRKVV  |
| TGGT1_244530 | GRA43 | S548 | QAKSL <b>S</b> VDNTTP |

\* Not significant in t-test due to variability between replicates ( $p > 0.05$ ) or quantified in only one type of labeling (Rv samples only)

**Table 3: Phosphosites upregulated in WNG1-deficient vacuoles.** Table is formatted as in Table 2.

## Figure 7

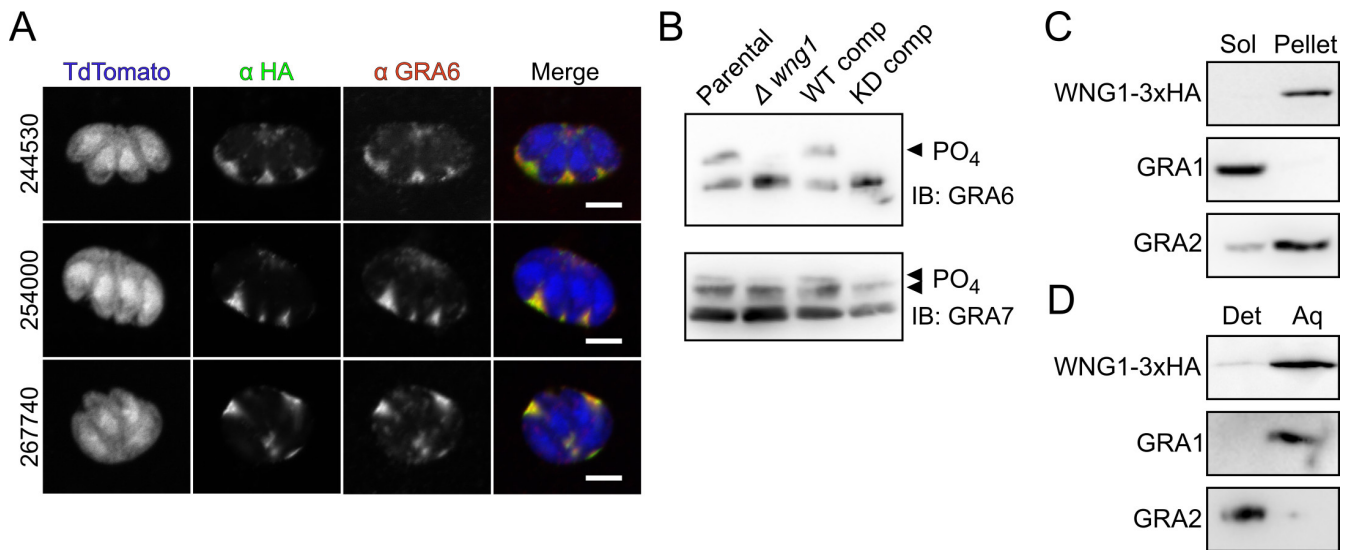

**Figure 7: WNG1 and its substrates are membrane associated.** (A) 0.5  $\mu$ m confocal slices of cells infected with parasites in which the indicated unannotated candidate substrates are endogenously 3xHA tagged (anti-HA; green), transiently transfected with TdTomato (blue), and co-stained with the dense granular and IVN marker GRA6 (red). Scale bars 5  $\mu$ m. (B) Western blot of lysates of cells infected with the indicated wild-type, knockout, or complement strains probed with anti-GRA6 and anti-GRA7 antisera. Phosphorylated bands are indicated with arrowheads. (C) Western blot of host and PV membranes that have been ultracentrifuged. WNG1-3xHA is detected with anti-HA, GRA1 and GRA2 are used as soluble and membrane-associated controls, respectively. (D) Western blot of host and PV membranes that have been subjected to Triton-X-114 partitioning between detergent (Det) and aqueous (Aq) phases.

**Figure 8**

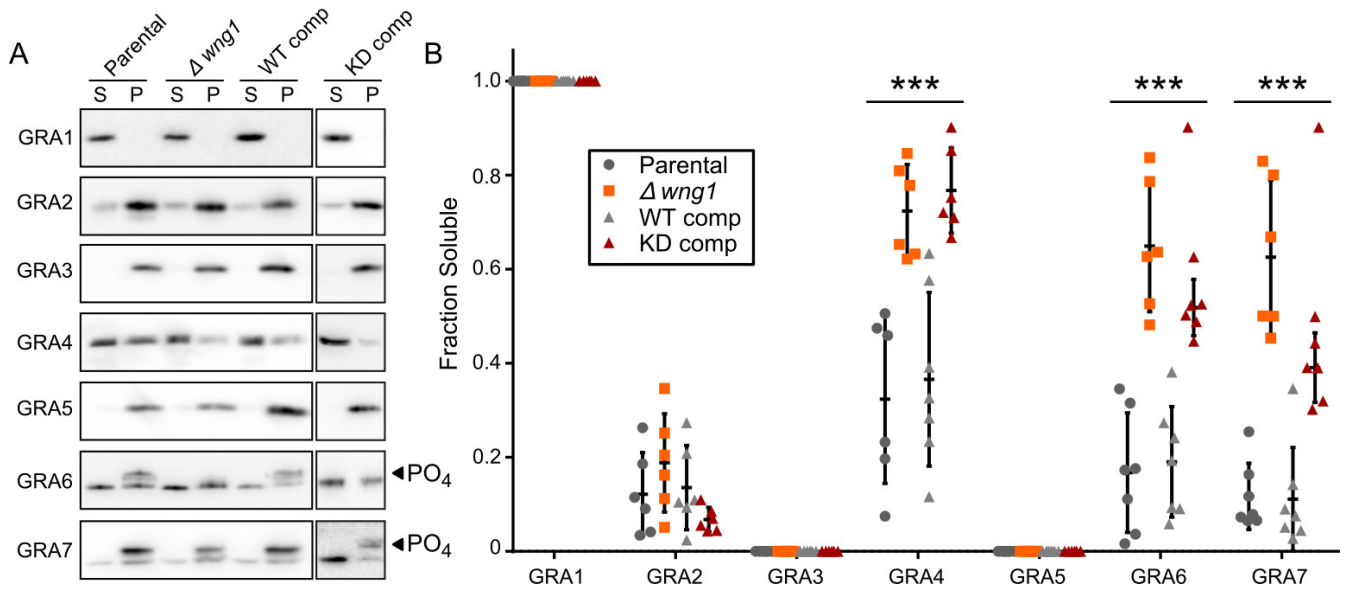

**Figure 8: Membrane association of GRA proteins correlates with WNG1 kinase activity.** (A) Representative western blot of samples in which host and PV membranes were ultracentrifuged and the soluble (S) and pellet (P) fractions were separated by SDS-PAGE and probed with the indicated antisera. Phosphorylated bands are indicated with arrowheads. (B) Quantification of n=6 biological replicates as in (A). Significance was calculated by ANOVA in Prism;  $p < 0.001$  (\*\*\*)

## Supplemental Figure S8

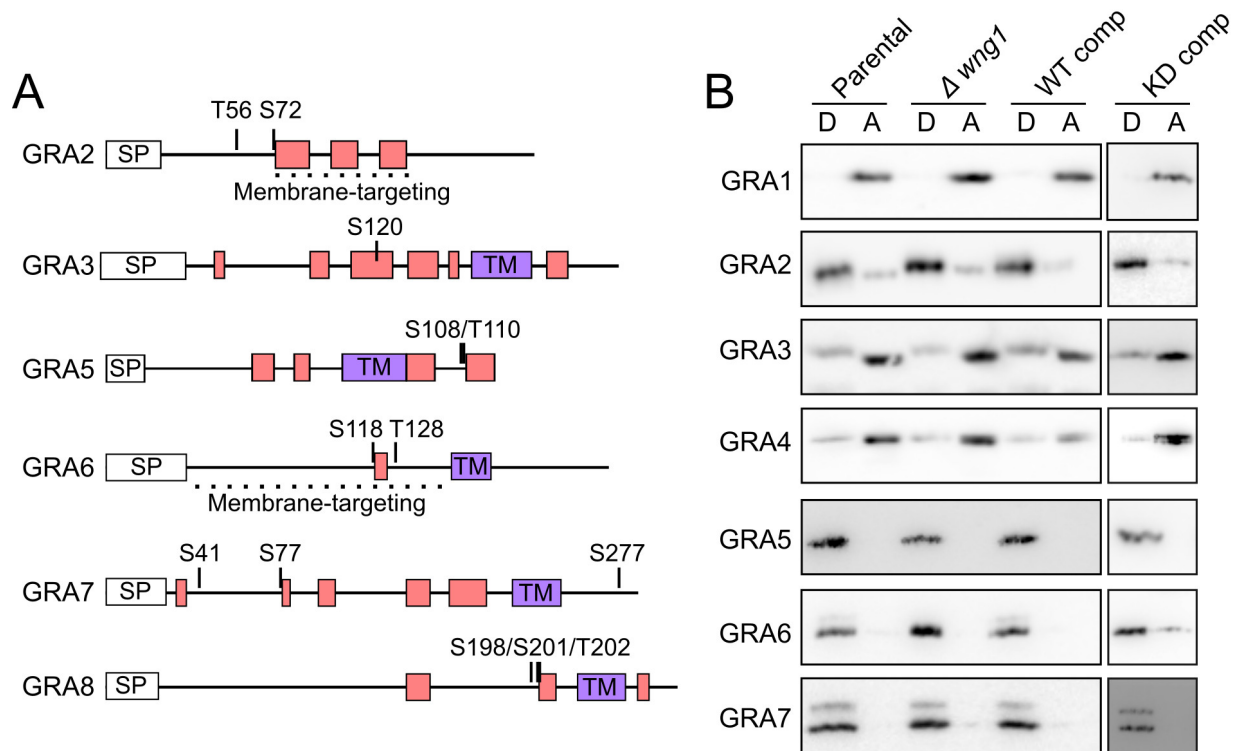

**Figure S8: WNG1 activity does not affect TX-114 partitioning of IVN GRA proteins.** (A) WNG1-dependent phosphosites are mapped onto the predicted secondary structures of the indicated GRA proteins. Predicted  $\alpha$ -helices are shown as rectangles. Predicted transmembrane helices (TM) are shaded purple. (B) Host and PV membranes from cells infected with the indicated strains were partitioned in TX-114 and the detergent (D) and aqueous (A) phases were separated by SDS-PAGE and analyzed by western blot probed with antibodies to the indicated GRA proteins.



**Figure 9**

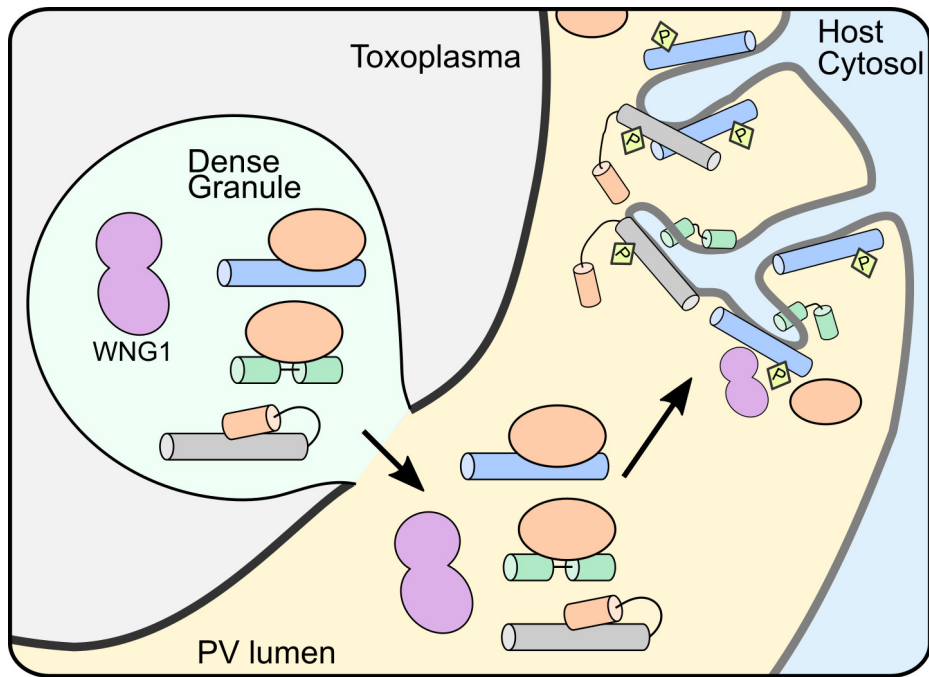

**Figure 9:** Model for WNG1 regulation of IVN GRA protein membrane association. Within the parasite secretory pathway, membrane-seeking GRA proteins (blue, green, and gray cylinders) are complexed with solubilizing proteins or domains (orange). Once secreted into the PV lumen, WNG1 is activated through an unknown mechanism and phosphorylates the GRAs, leading to their eventual insertion into the PV membrane and efficient stabilization of the IVN tubules.
